# Supplementary material for: Strongly reducing helical phenothiazines as recyclable organophotoredox catalysts
Source: Royal Society of Chemistry journal article supplement (doi:10.1039/d4cc00904e), 2024-01-01

## Supporting Information

### Strongly Reducing Helical Phenothiazines as Recyclable Organophotoredox Catalysts

Haru Ando,<sup>a</sup> Hiroyoshi Takamura,<sup>a</sup> Isao Kadota,<sup>a\*</sup> and Kenta Tanaka<sup>b\*</sup>

<sup>a</sup> *Department of Chemistry, Graduate School of Natural Science and Technology,  
Okayama University, 3-1-1 Tsushima-Naka, Kitaku, Okayama 700-8530, Japan*

<sup>b</sup> *Department of Chemistry, Research Institute for Interdisciplinary Science, Okayama  
University, 3-1-1 Tsushima-Naka, Kitaku, Okayama 700-8530, Japan*

|                                                                                  |     |
|----------------------------------------------------------------------------------|-----|
| 1. General information.....                                                      | S2  |
| 2. Experimental section.....                                                     | S3  |
| 3. Photophysical and redox properties of phenothiazine catalysts and ester ..... | S18 |
| 4. Reference.....                                                                | S23 |
| 5. <sup>1</sup> H NMR and <sup>13</sup> C NMR spectra data.....                  | S24 |

## 1. General information

Reagents were used as received from commercial suppliers unless otherwise indicated. Heating reactions were conducted in an oil bath. The analytical thin layer chromatography (TLC) was performed with aluminum TLC plates (Merck TLC silica gel 60 F<sub>254</sub>). Column chromatography was performed with Kanto Chemical silica gel 60N (40-100 mesh, spherical, neutral). The FT-IR spectra were recorded on IRSpirit-T. <sup>1</sup>H and <sup>13</sup>C NMR spectra were recorded on a Varian NMR System PS600 or a Varian 400MR ASW. Chemical shifts in the NMR spectra are reported in ppm with reference to the internal residual solvent (<sup>1</sup>H NMR, CDCl<sub>3</sub> 7.26 ppm, C<sub>6</sub>D<sub>6</sub> 7.16 ppm; <sup>13</sup>C NMR, CDCl<sub>3</sub> 77.0 ppm). The following abbreviations are used to designate the multiplicities: s = singlet, d = doublet, t = triplet, m = multiplet, br = broad. The high-resolution mass spectra were recorded on Bruker micrOTOF II (ESI-TOF-MS). The UV-Vis absorption spectra were measured with a JASCO V-770 spectrometer. The fluorescence spectra were obtained on a RF-6000. The cyclic voltammetry measurements were carried out with a ECstat-101. The photochemical reaction was carried out with a photoreactor (EvoluChem™ PhotoRedOx Box) and blue LED (HCK1012-01-012, λ<sub>max</sub> = 425 nm, 18 W).

## 2. Experimental section

### General procedure for synthesis of phenothiazine catalyst (Method A)<sup>1</sup>

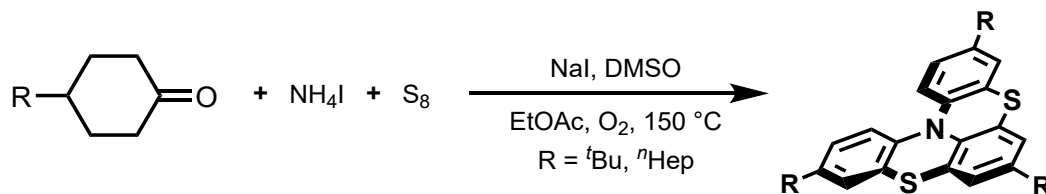

Ammonium iodide (365.0 mg, 2.5 mmol), sodium iodide (45.0 mg, 0.3 mmol), elemental sulfur (255.0 mg, 1.0 mmol), cyclohexanone derivatives (3.0 mmol), dimethyl sulfoxide (0.14 mL, 2.0 mmol), and ethyl acetate (3.0 mL) were added into a sealed tube. After bubbled with oxygen for 5 min, the resulting solution was stirred at 150 °C for 24 h. The reaction mixture was transferred to the recovery flask with ethyl acetate at room temperature and the volatiles were removed under reduced pressure. The residue was purified by column chromatography on silica gel (hexane) to yield the phenothiazine catalyst.

### Procedure for the synthesis of 3,7,11-tri-*tert*-butylbenzo[5,6][1,4]thiazino[2,3,4-*kl*]phenothiazine (PTHS 1)<sup>1</sup>

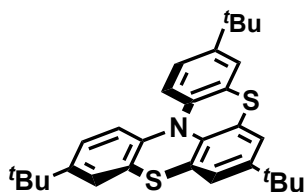

The reaction was conducted with ammonium iodide (362.3 mg, 2.5 mmol), sodium iodide (44.7 mg, 0.3 mmol), elemental sulfur (255.0 mg, 1.0 mmol), 4-*tert*-butyl cyclohexanone (462.5 mg, 3.0 mmol), dimethyl sulfoxide (0.14 mL, 2.0 mmol), and ethyl acetate (3.0 mL). The residue was purified by column chromatography on silica gel (hexane) to yield the desired product as yellow solid (225.6 mg, 48%).

<sup>1</sup>H NMR (600 MHz, CDCl<sub>3</sub>)  $\delta$  7.20 (s, 2H), 7.13-7.12 (m, 4H), 6.97 (s, 2H), 1.29 (s, 18H), 1.24 (s, 9H).

### Procedure for the synthesis of 3,7,11-tri-heptylbenzo[5,6][1,4]thiazino[2,3,4-kl]phenothiazine (PTHS 2)

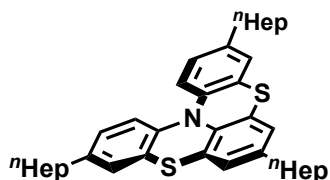

The reaction was conducted with ammonium iodide (362.4 mg, 2.5 mmol), sodium iodide (44.5 mg, 0.3 mmol), elemental sulfur (255.2 mg, 1.0 mmol), 4-heptyl cyclohexanone (0.67 mL, 3.0 mmol), dimethyl sulfoxide (0.14 mL, 2.0 mmol), and ethyl acetate (3.0 mL). The residue was purified by column chromatography on silica gel (hexane) to yield the desired product as yellow oil (185.3 mg, 31%).  $R_f = 0.58$  (hexane); IR (neat) 2955, 2925, 2854, 1490, 1451, 1323, 1313, 1130  $\text{cm}^{-1}$ ;  $^1\text{H}$  NMR (600 MHz,  $\text{CDCl}_3$ )  $\delta$  7.07 (d,  $J = 8.4$  Hz, 2H), 7.00 (d,  $J = 2.4$  Hz, 2H), 6.90 (dd,  $J = 8.4, 1.8$  Hz, 2H), 6.78 (s, 2H), 2.52 (t,  $J = 7.2$  Hz, 4H), 2.45 (q,  $J = 6.6$  Hz, 2H), 1.59-1.51 (m, 6H), 1.32-1.27 (m, 24H), 0.90-0.86 (m, 9H);  $^{13}\text{C}$  NMR (150 MHz,  $\text{CDCl}_3$ )  $\delta$  140.4, 139.5, 139.2, 137.4, 127.4, 127.4, 126.4, 125.4, 125.3, 120.1, 35.1, 34.9, 31.8, 31.8, 31.4, 31.3, 29.2, 29.2, 29.1, 29.1, 22.7, 22.6, 14.1, 14.1; HRMS (ESI TOF) calcd for  $\text{C}_{39}\text{H}_{53}\text{NS}_2$   $[\text{M}]^+$  599.3619, found 599.3618.

### Procedure for the synthesis of 3,7,11-tri-methoxy[5,6][1,4]thiazino[2,3,4-kl]phenothiazine (PTHS 3, Method B)<sup>2</sup>

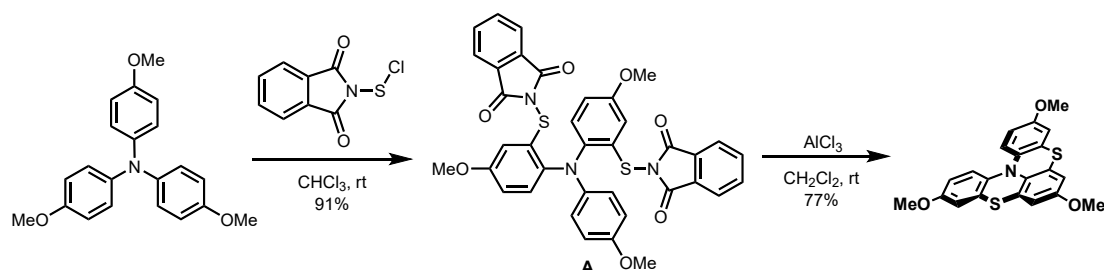

To a solution of tris(4-methoxyphenyl)amine (346 mg, 1.03 mmol) in dry  $\text{CHCl}_3$  (8.24 mL) was added phthalimidesulfonyl chloride (550 mg, 2.57 mmol) under Ar atmosphere.<sup>2,3</sup> After stirring for 3.5 h at room temperature, the reaction mixture was diluted with  $\text{CH}_2\text{Cl}_2$ , and washed with a saturated  $\text{NaHCO}_3$  aq. and water. The organic layer was dried over  $\text{Na}_2\text{SO}_4$ , filtered, and concentrated under reduced pressure. The residue was purified by flash chromatography (hexane/EtOAc = 3:1) to provide the thiophthalimide **A** as a yellow solid (647.5 mg, 91% yield).

$^1\text{H}$  NMR (600 MHz,  $\text{CDCl}_3$ )  $\delta$  7.93 (dd,  $J = 5.4, 3.0$  Hz, 4H), 7.79 (dd,  $J = 5.4, 3.0$  Hz, 4H), 7.56 (d,  $J = 8.4$  Hz, 2H), 6.82 (d,  $J = 9.0$  Hz, 2H), 6.79 (dd,  $J = 9.0, 3.0$  Hz, 2H), 6.76-6.75 (m, 2H), 6.56 (d,  $J = 3.0$  Hz, 2H), 3.76 (s, 3H), 3.68 (s, 6H).

To a solution of thiophthalimide **A** (97.4 mg, 0.14 mmol) in dry  $\text{CH}_2\text{Cl}_2$  (5.6 mL) was added  $\text{AlCl}_3$  (74.7 mg, 0.56 mmol) under Ar atmosphere. After stirring for 3 h at room temperature, the mixture was diluted with  $\text{CH}_2\text{Cl}_2$  and washed with a saturated  $\text{Na}_2\text{CO}_3$  aq. and water. The organic layer was dried over  $\text{Na}_2\text{SO}_4$ , filtered, and concentrated under reduced pressure. The residue was purified by flash chromatography (hexane/EtOAc = 30:1 to 10:1) to provide the desired phenothiazine catalyst as a dark yellow glassy solid (42.8 mg, 77% yield).

$^1\text{H}$  NMR (600 MHz,  $\text{C}_6\text{D}_6$ )  $\delta$  6.94 (d,  $J = 9.0$  Hz, 2H), 6.74 (d,  $J = 2.4$  Hz, 2H), 6.53 (s, 2H), 6.49 (dd,  $J = 9.0, 3.0$  Hz, 2H), 3.20 (s, 6H), 3.09 (s, 3H).

## Scope and limitation of three-component oxytrifluoromethylation of 1,1-diphenylethylene

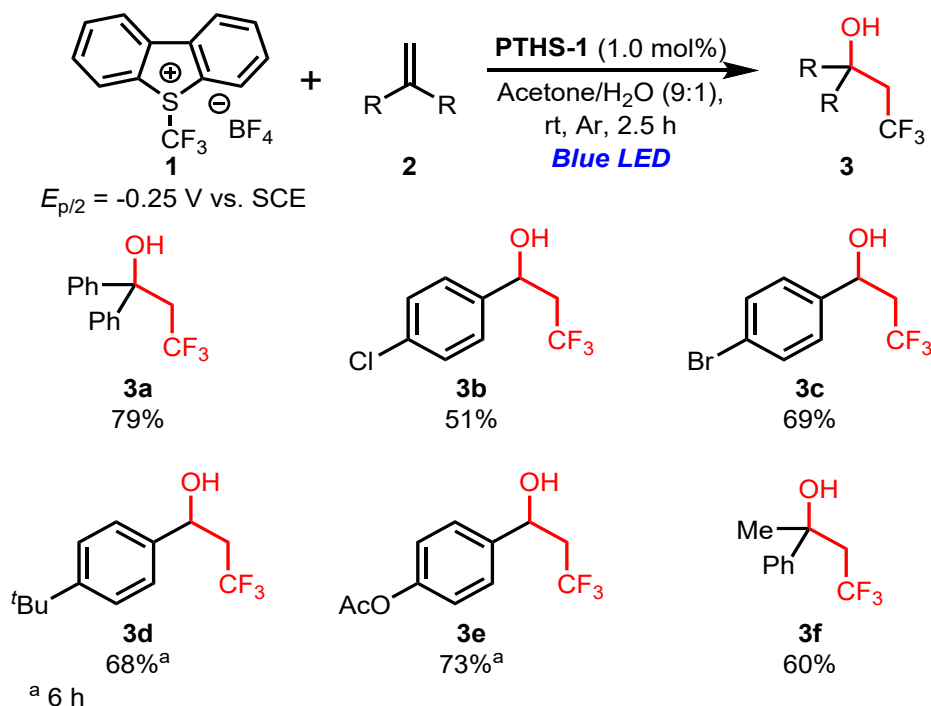

## General procedure for three-component oxytrifluoromethylation of alkenes<sup>4</sup>

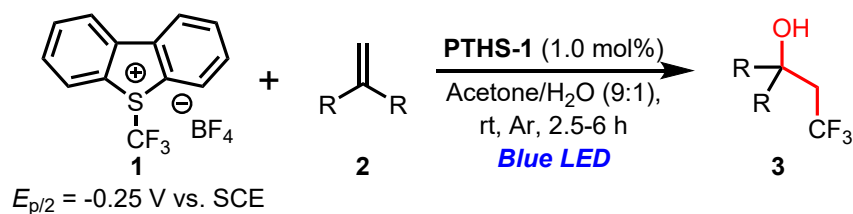

Umamoto reagent **1** (35.8 mg, 0.105 mmol), alkene **2** (0.1 mmol), phenothiazine catalyst (1.0  $\mu\text{mol}$ ), Acetone (1.8 mL), and H<sub>2</sub>O (0.2 mL) were added into a 4 mL borosilicate vial. After bubbled with Ar for 5 min, the resulting solution was stirred at room temperature under blue LED irradiation for 2.5-6 h. The reaction mixture was added saturated Na<sub>2</sub>SO<sub>3</sub> aq. and extracted with CH<sub>2</sub>Cl<sub>2</sub>. The organic layer was dried over Na<sub>2</sub>SO<sub>4</sub>, filtered, and concentrated under reduced pressure. The residue was purified by flash chromatography to give the desired product **3**.

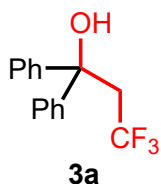

**3,3,3-Trifluoro-1,1-diphenylpropan-1-ol (3a):** Umemoto reagent **1** (35.8 mg, 0.105 mmol), 1,1-diphenylethelene **2a** (17.5  $\mu$ L 0.1 mmol), **PTHS-1** (0.5 mg, 1.0  $\mu$ mmol), Acetone (1.8 mL), and H<sub>2</sub>O (0.2 mL) was used under irradiation with blue LED for 2.5 h. The residue was purified by column chromatography on silica gel (hexane to hexane/EtOAc = 10:1) to give the desired product **3a** (21.0 mg, 79%) as a light-yellow oil.

<sup>1</sup>H NMR (600 MHz, CDCl<sub>3</sub>)  $\delta$  7.43-7.42 (m, 4H), 7.35-7.33 (m, 4H), 7.28-7.25 (m, 2H), 3.21 (q,  $J$  = 10.2 Hz, 2H), 2.64 (d,  $J$  = 1.2 Hz, 1H).

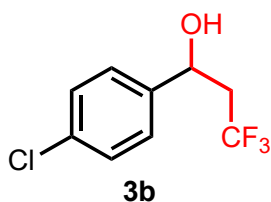

**1-(4-Chlorophenyl)-3,3,3-trifluoropropan-1-ol (3b):** Umemoto reagent **1** (35.8 mg, 0.105 mmol), 4-chlorostyrene **2b** (12.7  $\mu$ L, 0.1 mmol), **PTHS-1** (0.5 mg, 1.0  $\mu$ mmol), Acetone (1.8 mL), and H<sub>2</sub>O (0.2 mL) was used under irradiation with blue LED for 2.5 h. The residue was purified by column chromatography on silica gel (hexane/EtOAc = 20:1 to hexane/EtOAc = 10:1) to give the desired product **3b** (11.5 mg, 51%) as a colorless oil.

<sup>1</sup>H NMR (400 MHz, CDCl<sub>3</sub>)  $\delta$  7.37-7.32 (m, 4H), 5.08 (d,  $J$  = 6.0 Hz, 1H), 2.66-2.56 (m, 1H), 2.47-2.39 (m, 1H), 2.15 (d,  $J$  = 2.0 Hz, 1H).

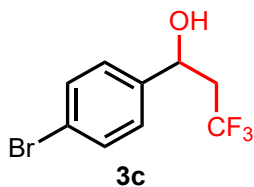

**1-(4-Bromophenyl)-3,3,3-trifluoropropan-1-ol (3c):** Umemoto reagent **1** (35.8 mg, 0.105 mmol), 4-bromostyrene **2c** (13.5  $\mu$ L, 0.1 mmol), **PTHS-1** (0.5 mg, 1.0  $\mu$ mmol), Acetone (1.8 mL), and H<sub>2</sub>O (0.2 mL) was used under irradiation with blue LED for 2.5

h. The residue was purified by column chromatography on silica gel (hexane/EtOAc = 20:1 to hexane/EtOAc = 10:1) to give the desired product **3c** (18.5 mg, 69%) as a colorless oil.

$^1\text{H NMR}$  (600 MHz,  $\text{CDCl}_3$ )  $\delta$  7.51 (d,  $J = 8.4$  Hz, 2H), 7.26 (d,  $J = 8.4$  Hz, 2H), 5.06 (d,  $J = 7.8$  Hz, 1H), 2.65-2.56 (m, 1H), 2.46-2.38 (m, 1H), 2.19 (s, 1H).

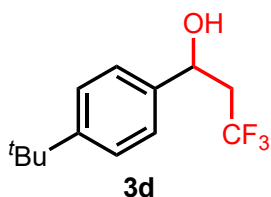

**1-(4-(*tert*-Butyl)phenyl)-3,3,3-trifluoropropan-1-ol (3d):** Umemoto reagent **1** (35.8 mg, 0.105 mmol), 4-*tert*-butylstyrene **2d** (17.8  $\mu\text{L}$ , 0.1 mmol), **PTHS-1** (0.5 mg, 1.0  $\mu\text{mmol}$ ), Acetone (1.8 mL), and  $\text{H}_2\text{O}$  (0.2 mL) was used under irradiation with blue LED for 6 h. The residue was purified by column chromatography on silica gel (hexane/EtOAc = 20:1 to hexane/EtOAc = 10:1) to give the desired product **3d** (16.7 mg, 68%) as a colorless oil.

$^1\text{H NMR}$  (600 MHz,  $\text{CDCl}_3$ )  $\delta$  7.41 (d,  $J = 8.4$  Hz, 2H), 7.31 (d,  $J = 8.4$  Hz, 2H), 5.07 (dd,  $J = 9.6, 3.6$  Hz, 1H), 2.69-2.60 (m, 1H), 2.49-2.41 (m, 1H), 2.07 (s, 1H), 1.32 (s, 9H).

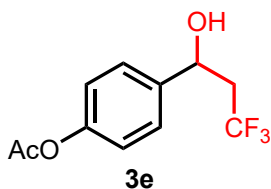

**4-(3,3,3-Trifluoro-1-hydroxypropyl)phenyl acetate (3e):** Umemoto reagent **1** (35.8 mg, 0.105 mmol), 4-vinylphenyl acetate **2e** (15.2  $\mu\text{L}$ , 0.1 mmol), **PTHS-1** (0.5 mg, 1.0  $\mu\text{mmol}$ ), Acetone (1.8 mL), and  $\text{H}_2\text{O}$  (0.2 mL) was used under irradiation with blue LED for 6 h. The residue was purified by column chromatography on silica gel (hexane/EtOAc = 20:1 to hexane/EtOAc = 4:1) to give the desired product **3e** (18.0 mg, 73%) as a colorless oil.

$^1\text{H NMR}$  (600 MHz,  $\text{CDCl}_3$ )  $\delta$  7.40 (d,  $J = 8.4$  Hz, 2H), 7.10 (d,  $J = 8.4$  Hz, 2H), 5.09 (dd,  $J = 9.0, 3.0$  Hz, 1H), 2.66-2.57 (m, 1H), 2.48-2.40 (m, 1H), 2.31 (s, 3H), 2.20 (s, 1H).



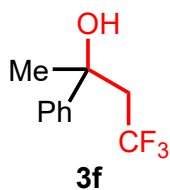

**4,4,4-Trifluoro-2-phenylbutan-2-ol (3d):** Umemoto reagent **1** (35.8 mg, 0.105 mmol),  $\alpha$ -methylstyrene **2f** (13.0  $\mu$ L, 0.1 mmol), **PTHS-1** (0.5 mg, 1.0  $\mu$ mmol), Acetone (1.8 mL), and H<sub>2</sub>O (0.2 mL) was used under irradiation with blue LED for 2.5 h. The residue was purified by column chromatography on silica gel (hexane/EtOAc = 20:1 to hexane/EtOAc = 10:1) to give the desired product **3f** (12.2 mg, 60%) as a color less oil. <sup>1</sup>H NMR (600 MHz, CDCl<sub>3</sub>)  $\delta$  7.47 (dd,  $J$  = 7.8, 1.2 Hz, 2H), 7.37 (t,  $J$  = 7.8 Hz, 2H), 7.29 (t,  $J$  = 7.5 Hz, 1H), 2.72-2.59 (m, 2H), 2.16 (s, 1H), 1.72 (s, 3H).

## Scope and limitation of photoredox cross-coupling reaction of aryl iodides with triethylphosphite

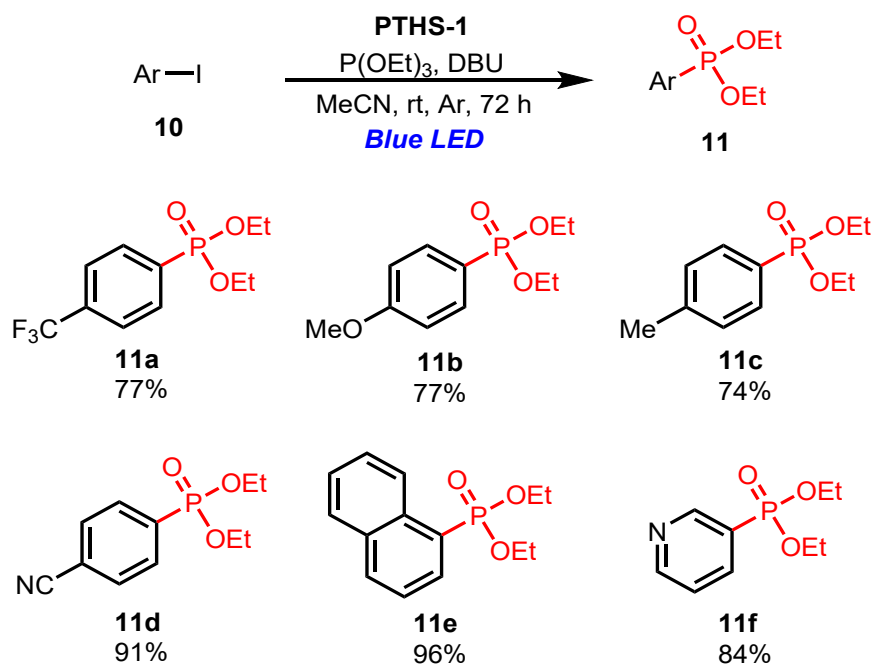

## General procedure for photoredox cross-coupling reaction of aryl iodides with triethylphosphite<sup>9</sup>

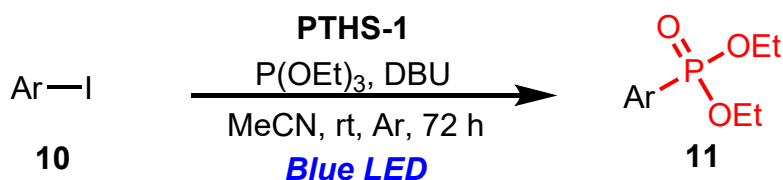

Aryl iodide **10** (0.1 mmol), triethyl phosphite (50  $\mu$ L, 0.3 mmol), DBU (30  $\mu$ L, 0.2 mmol), **PTHS-1** (1.0  $\mu$ mol), and MeCN (1.0 mL) were added into a 4 mL borosilicate vial. After bubbled with Ar for 5 min at 0  $^{\circ}$ C, the resulting solution was stirred at room temperature under blue LED irradiation for 72 h. The reaction mixture was added H<sub>2</sub>O and extracted with EtOAc. The organic layer was dried over Na<sub>2</sub>SO<sub>4</sub>, filtered, and concentrated under reduced pressure. The residue was purified by flash chromatography to give the product **11**.

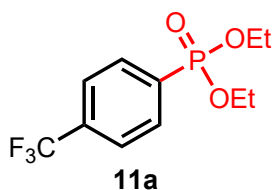

**Diethyl (4-(trifluoromethyl)phenyl)phosphonate (11a):** 4-Iodobenzotrifluoride **10a** (14.5  $\mu$ L, 0.1 mmol), triethyl phosphite (50  $\mu$ L, 0.3 mmol), DBU (30  $\mu$ L, 0.2 mmol), **PTHS-1** (4.7 mg, 10  $\mu$ mol), and MeCN (1.0 mL) was used under irradiation with Blue LED for 72 h. The residue was purified by column chromatography on silica gel (hexane/EtOAc = 10:1 to hexane/EtOAc = 1:1) to give the desired product **11a** (21.8 mg, 77%) as a light-yellow oil.

$^1\text{H}$  NMR (600 MHz,  $\text{CDCl}_3$ )  $\delta$  7.94 (dd,  $J = 12.6, 7.8$  Hz, 2H), 7.73 (dd,  $J = 7.8, 3.6$  Hz, 2H), 4.21-4.07 (m, 4H), 1.33 (t,  $J = 7.2$  Hz, 6H).

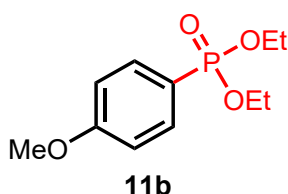

**Diethyl (4-methoxyphenyl)phosphonate (11b):** 4-Iodoanisole **10b** (23.4 mg, 0.1 mmol), triethyl phosphite (50  $\mu$ L, 0.3 mmol), DBU (30  $\mu$ L, 0.2 mmol), **PTHS-1** (4.7 mg, 10  $\mu$ mol), and MeCN (1.0 mL) was used under irradiation with blue LED for 72 h. The residue was purified by column chromatography on silica gel (hexane/EtOAc = 10:1 to EtOAc) to give the desired product **11b** (18.9 mg, 77%) as a color less oil.

$^1\text{H}$  NMR (400 MHz,  $\text{CDCl}_3$ )  $\delta$  7.74 (dd,  $J = 12.4, 8.8$  Hz, 2H), 6.96 (dd,  $J = 8.8, 4.8$  Hz, 2H), 4.16-3.99 (m, 4H), 3.84 (s, 3H), 1.30 (t,  $J = 7.2$  Hz, 6H).

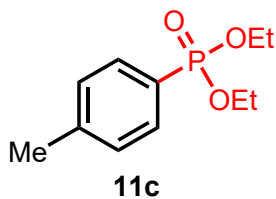

**Diethyl *p*-tolylphosphonate (11c):** 4-Iodotoluene **10c** (21.8 mg, 0.1 mmol), triethyl phosphite (50  $\mu$ L, 0.3 mmol), DBU (30  $\mu$ L, 0.2 mmol), **PTHS-1** (4.7 mg, 10  $\mu$ mol), and MeCN (1.0 mL) was used under irradiation with blue LED for 72 h. The residue was purified by column chromatography on silica gel (hexane/EtOAc = 20:1 to hexane/EtOAc = 1:2) to give the desired product **11c** (16.9 mg, 74%) as a color less oil.

$^1\text{H}$  NMR (600 MHz,  $\text{CDCl}_3$ )  $\delta$  7.70 (dd,  $J = 13.2, 8.4$  Hz, 2H), 7.27 (dd,  $J = 8.4, 4.2$  Hz, 2H), 4.16-4.02 (m, 4H), 2.40 (s, 3H), 1.31 (t,  $J = 7.2$  Hz, 6H).

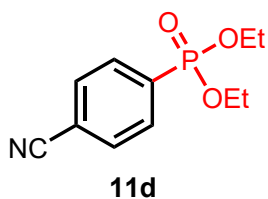

**Diethyl (4-cyanophenyl)phosphonate (11d):** 4-Iodobenzonitrile **10d** (22.9 mg, 0.1 mmol), triethyl phosphite (50  $\mu$ L, 0.3 mmol), DBU (30  $\mu$ L, 0.2 mmol), **PTHS-1** (4.7 mg, 10  $\mu$ mol), and MeCN (1.0 mL) was used under irradiation with blue LEDs for 72 h. The residue was purified by column chromatography on silica gel (hexane/EtOAc = 20:1 to hexane/EtOAc = 1:2) to give the desired product **11d** (21.7 mg, 91%) as a color less oil.  $^1\text{H}$  NMR (400 MHz,  $\text{CDCl}_3$ )  $\delta$  7.42 (dd,  $J = 13.2, 8.4$  Hz, 2H), 7.77-7.73 (m, 2H), 4.23-4.06 (m, 4H), 1.33 (t,  $J = 7.0$  Hz, 6H).

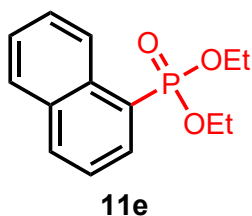

**Diethyl naphthalen-1-ylphosphonate (11e):** 1-Iodonaphthalene **10e** (14.6  $\mu$ L, 0.1 mmol), triethyl phosphite (50  $\mu$ L, 0.3 mmol), DBU (30  $\mu$ L, 0.2 mmol), **PTHS-1** (4.7 mg, 10  $\mu$ mol), and MeCN (1.0 mL) was used under irradiation with blue LED for 72 h. The residue was purified by column chromatography on silica gel (hexane/EtOAc = 20:1 to hexane/EtOAc = 1:1) to give the desired product **11e** (25.3 mg, 96%) as a color less oil.  $^1\text{H}$  NMR (600 MHz,  $\text{CDCl}_3$ )  $\delta$  8.52 (d,  $J = 8.4$  Hz, 1H), 8.25 (ddd,  $J = 16.8, 7.2, 1.2$  Hz, 1H), 8.04 (d,  $J = 8.4$  Hz, 1H), 7.99 (d,  $J = 7.8$  Hz, 1H), 7.62-7.60 (m, 1H), 7.57-7.52 (m, 2H), 4.24-4.18 (m, 2H), 4.13-4.04 (m, 2H), 1.31 (t,  $J = 7.2$  Hz, 6H).

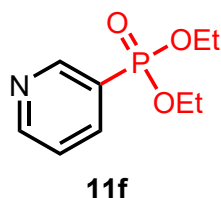

**Diethyl pyridin-3-ylphosphonate (11f):** 3-Iodopyridine **10f** (20.5 mg, 0.1 mmol), triethyl phosphite (50  $\mu$ L, 0.3 mmol), DBU (30  $\mu$ L, 0.2 mmol), **PTHS-1** (4.7 mg, 10  $\mu$ mol), and MeCN (1.0 mL) was used under irradiation with blue LED for 72 h. The residue was purified by column chromatography on silica gel (hexane/EtOAc = 20:1 to

EtOAc) to give the desired product **11f** (18.1 mg, 84%) as a light-yellow oil.

$^1\text{H NMR}$  (600 MHz,  $\text{CDCl}_3$ )  $\delta$  8.97 (dd,  $J = 6.0, 1.2$  Hz, 1H), 8.78-8.76 (m, 1H), 8.10 (ddt,  $J = 13.2, 7.8, 1.8$  Hz, 1H), 7.42-7.39 (m, 1H), 4.22-4.09 (m, 4H), 1.34 (t,  $J = 6.9$  Hz, 6H).

### General procedure for decarboxylative $\text{C}(\text{sp}^3)\text{-O}$ bond formation<sup>5</sup>

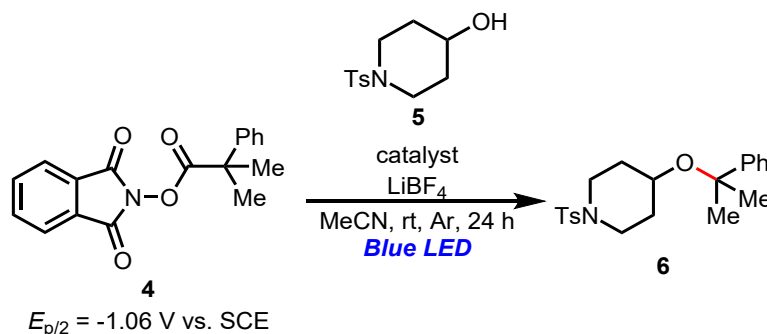

Ester **4** (61.9 mg, 0.2 mmol), alcohol **5** (153.2 mg, 0.6 mmol), phenothiazine catalyst (10 mol%),  $\text{LiBF}_4$  (1.9 mg, 10 mol%), and MeCN (1.0 mL) were added into a 4 mL borosilicate vial. After bubbled with Ar for 5 min, the resulting solution was stirred at room temperature under blue LED irradiation for 24 h.<sup>6,7</sup> The reaction mixture was filtered through with a short plug of silica gel using diethyl ether and the residue was concentrated under reduced pressure. The residue was purified by flash chromatography (hexane/EtOAc = 20:1 to 10:1) to give the desired product **6** as a yellow oil.

$^1\text{H NMR}$  (400 MHz,  $\text{CDCl}_3$ )  $\delta$  7.61 (d,  $J = 8.0$  Hz, 2H), 7.39 (d,  $J = 7.2$  Hz, 2H), 7.31-7.21 (m, 5H), 3.40-3.34 (m, 2H), 3.20-3.14 (m, 1H), 2.56 (td,  $J = 10.4, 3.2$  Hz, 2H), 2.43 (s, 3H), 1.72-1.58 (m, 4H), 1.49 (s, 6H).

### General procedure for defluoroalkylation of 1,3-bis(trifluoromethyl)benzene<sup>8</sup>

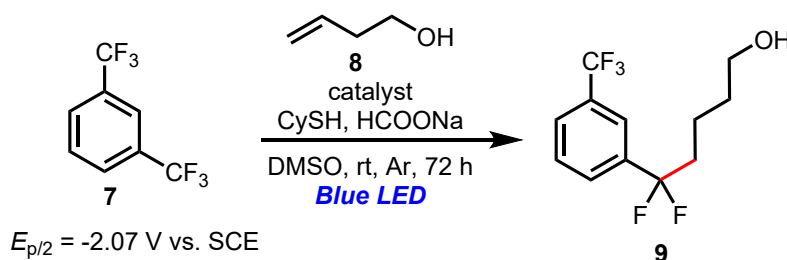

1,3-Bis(trifluoromethyl)benzene **7** (15.3  $\mu\text{L}$ , 0.1 mmol), 3-butene-1-ol **8** (25.5  $\mu\text{L}$ , 0.3 mmol), phenothiazine catalyst (10 mol%), sodium formate (20.4 mg, 0.3 mmol), and DMSO (1.0 mL) were added into a 4 mL borosilicate vial followed by cyclohexane thiol (1.2  $\mu\text{L}$ , 0.01 mmol). The solution was bubbled with Ar for 5 min and stirred at room temperature under blue LED irradiation for 72 h. The reaction mixture was diluted with

saturated Na<sub>2</sub>SO<sub>3</sub> aq. and extracted with EtOAc. The organic layer was dried over Na<sub>2</sub>SO<sub>4</sub>, filtered, and concentrated under reduced pressure. The residue was purified by flash chromatography (hexane/EtOAc = 6:1 to 4:1) to give the product **9** as a colorless oil.

<sup>1</sup>H NMR (600 MHz, CDCl<sub>3</sub>) δ 7.73 (s, 1H), 7.70 (d, *J* = 7.8 Hz, 1H), 7.66 (d, *J* = 7.8 Hz, 1H), 7.56 (t, *J* = 7.8 Hz, 1H), 3.65 (t, *J* = 6.3 Hz, 2H), 2.21-2.13 (m, 2H), 1.63-1.59 (m, 2H), 1.56-1.51 (m, 2H), 1.25 (s, 1H).

### Procedure for recycling performance of PTHS-1<sup>9</sup>

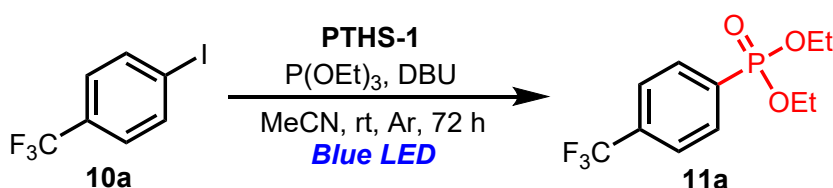

(Run 1) According to the general procedure for photoredox cross-coupling of 4-trifluoriodobenzene with triethylphosphite, 4-iodotrifluoromethylbenzene **10a** (14.5 μL, 0.1 mmol), triethyl phosphite (50 μL, 0.3 mmol), DBU (30 μL, 0.2 mmol), **PTHS-1** (4.7 mg, 0.01 mmol), and MeCN (1.0 mL) was used under irradiation with blue LED for 72 h. The reaction mixture was added H<sub>2</sub>O and extracted with EtOAc. The organic layer was dried over Na<sub>2</sub>SO<sub>4</sub>, filtered, and concentrated under reduced pressure. The residue was purified by column chromatography on silica gel (hexane/EtOAc = 20:1 to EtOAc) to give the desired product **11a** (21.8 mg, 77%) as a light-yellow oil. Run 2-4 were carried out with the same procedure with recovered catalyst. The reactions with **PTH-1** were also carried out the same procedure.

### Gram scale condition of photoredox cross-coupling reaction of 4-trifluoromethylbenzene with triethylphosphite<sup>9</sup>

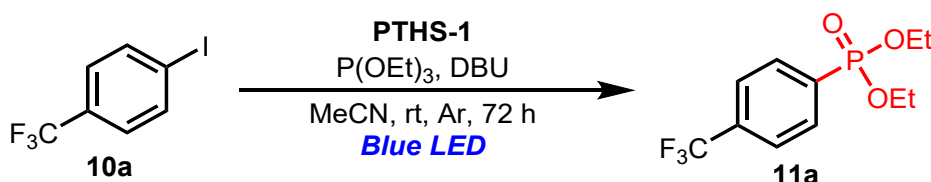

4-Iodotrifluoromethylbenzene **10** (0.72 mL, 5.0 mmol), triethyl phosphite (2.57 mL, 15.0 mmol), DBU (1.49 mL, 10.0 mmol), **PTHS-1** (236.9 mg, 10 mol%), and MeCN (50.0 mL) were added into a 200 mL 3 neck flask. After bubbled with Ar for 5 min at 0 °C, the resulting solution was stirred at room temperature under blue LED irradiation for 72 h. The reaction mixture was added H<sub>2</sub>O and extracted with EtOAc. The organic layer was

dried over Na<sub>2</sub>SO<sub>4</sub>, filtered, and concentrated under reduced pressure. The residue was purified by flash chromatography (hexane/EtOAc = 100:1 to 1:1) to give the product **11** (1.194 g, 85%) as a light-yellow oil and recover **PTHS-1** (228.4 mg, 96%) as a yellow solid.

### Photochemical sulfonylation of phenothiazines<sup>10</sup>

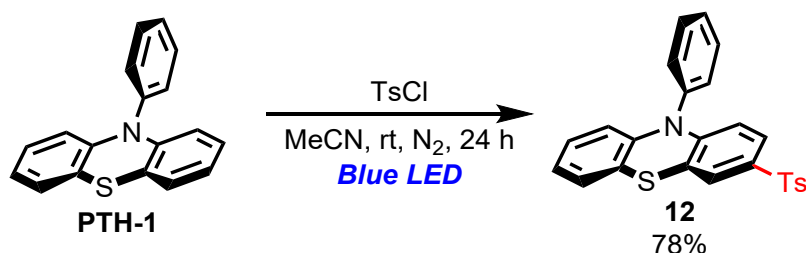

**PTH-1** (55.1 mg, 0.2 mmol) and tosyl chloride (38.1 mg, 0.2 mmol) were added into a 4 mL borosilicate vial. After bubbled with N<sub>2</sub> for 5 min, MeCN (1.0 mL) was added to the mixture via syringe. The resulting solution was irradiated with blue LED and stirred at room temperature for 24 h. The mixture was concentrated in vacuo and purified by flash column chromatography (hexane/EtOAc = 100:1 to 4:1) to give the product **12** (67.3 mg, 78%) as a yellow solid.

<sup>1</sup>H NMR (600 MHz, CDCl<sub>3</sub>)  $\delta$  7.75 (d,  $J$  = 8.4 Hz, 2H), 7.62 (t,  $J$  = 7.8 Hz, 2H), 7.52 (t,  $J$  = 7.8 Hz, 1H), 7.47 (d,  $J$  = 1.8 Hz, 1H), 7.33-7.31 (m, 3H), 7.27-7.26 (m, 2H), 6.96-6.94 (m, 1H), 6.84-6.80 (m, 2H), 6.12-6.09 (m, 2H), 2.38 (s, 3H)

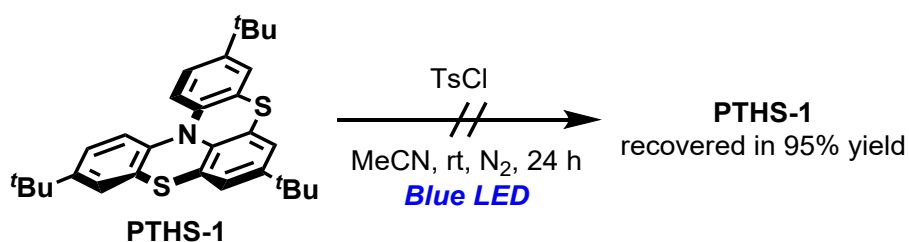

**PTHS-1** (94.7 mg, 0.2 mmol) and tosyl chloride (38.1 mg, 0.2 mmol) were added into a 4 mL borosilicate vial. After bubbled with N<sub>2</sub> for 5 min, MeCN (1.0 mL) was added to the mixture via a syringe. The resulting solution was irradiated with blue LED and stirred at room temperature for 24 h. The mixture was concentrated in vacuo and purified by flash column chromatography (hexane/EtOAc = 100:1) to recover **PTHS-1** (89.5 mg, 95%) as a yellow solid.

**Blank experiments of three-component oxytrifluoromethylation of 1,1-diphenylethylene<sup>a</sup>**

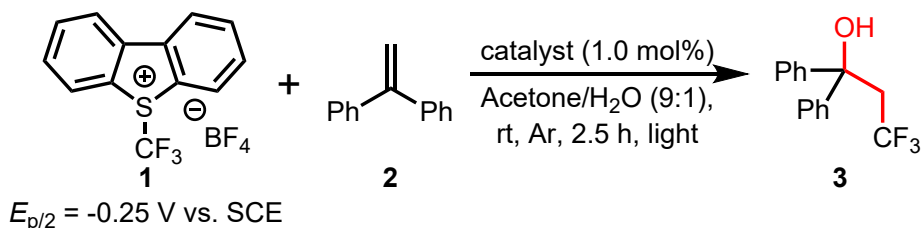

| entry | catalyst | light    | yield (%) |
|-------|----------|----------|-----------|
| 1     | PTHS-1   | Blue LED | 79        |
| 2     | /        | Blue LED | trace     |
| 3     | PTHS-1   | /        | trace     |

<sup>a</sup> All reactions were carried out with **1** (0.105 mmol), **2** (0.1 mmol) in acetone/H<sub>2</sub>O (9:1) at room temperature under Ar atmosphere.

**Blank experiments of decarboxylative C(sp<sup>3</sup>)-O bond formation<sup>a</sup>**

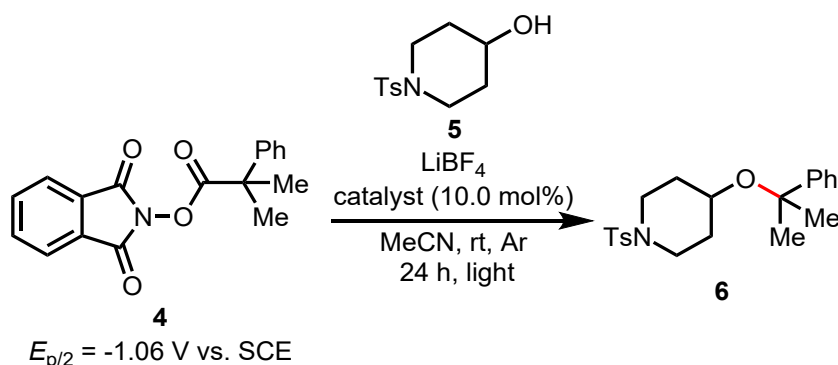

| entry | catalyst | light    | yield (%) |
|-------|----------|----------|-----------|
| 1     | PTHS-1   | Blue LED | 60        |
| 2     | /        | Blue LED | 0         |
| 3     | PTHS-1   | /        | 0         |

<sup>a</sup> All reactions were carried out with **4** (0.2 mmol), **5** (0.6 mmol), LiBF<sub>4</sub> (10 mol%) in MeCN at room temperature under Ar atmosphere.

**Blank experiments of defluoroalkylation of 1,3-bis(trifluoromethyl)benzene<sup>a</sup>**

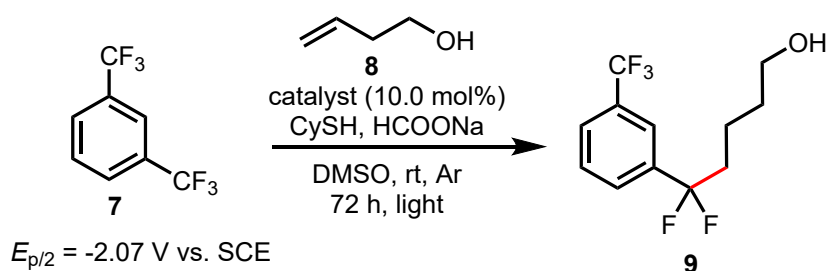



| entry | catalyst | light    | yield (%) |
|-------|----------|----------|-----------|
| 1     | PTHS-1   | Blue LED | 83        |
| 2     | /        | Blue LED | 0         |
| 3     | PTHS-1   | /        | 0         |

<sup>a</sup> All reactions were carried out with **7** (0.1 mmol), **8** (0.3 mmol), cyclohexane thiol (10 mol%), sodium formate (0.3 mmol) in DMSO at room temperature under Ar atmosphere.

### Blank experiments of photoredox cross-coupling reaction of 4-trifluoromethyliodobenzene with triethylphosphite<sup>a</sup>

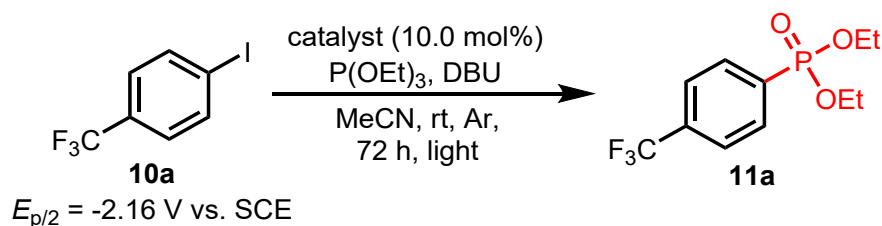

| entry | catalyst | light    | yield (%) |
|-------|----------|----------|-----------|
| 1     | PTHS-1   | Blue LED | 77        |
| 2     | /        | Blue LED | trace     |
| 3     | PTHS-1   | /        | 0         |

<sup>a</sup> All reactions were carried out with **10a** (0.1 mmol), triethylphosphite (0.3 mmol), DBU (0.2 mmol) in MeCN at room temperature under Ar atmosphere.

### Examination of catalyst amount

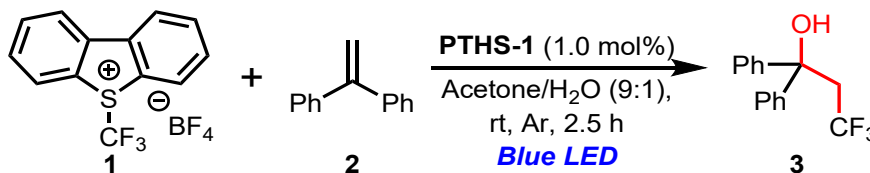

| entry | PTHS-1   | yield (%) |
|-------|----------|-----------|
| 1     | 0.1 mol% | 48%       |
| 2     | 1.0 mol% | 79%       |

<sup>a</sup> All reactions were carried out with **1** (0.105 mmol), **2** (0.1 mmol), and PTHS-1 catalyst in acetone/H<sub>2</sub>O (9:1, v/v) at room temperature under an Ar atmosphere and blue-light irradiation ( $\lambda_{\text{max}} = 425 \text{ nm}$ , 18 W).

### 3. Photophysical and redox properties of phenothiazine catalysts and ester

The samples for the electrochemical measurements were prepared with 10 mL of a 0.1 M tetrabutylammonium perchlorate solution in dry  $\text{CH}_2\text{Cl}_2$  or dry MeCN and 0.1 mmol of substrates. Cyclic voltammetry measurements were carried out with a computer-controlled potentiostat (ECstat-101, EC FRONTIER CO., LTD). Cyclic voltammetry was recorded using an undivided cell equipped with a working electrode (Pt disk electrode,  $\phi$  3mm), a counter electrode (Pt wire), and a reference electrode (Ag wire). The ferrocene/ferrocenium couple ( $\text{Fc}/\text{Fc}^+$ ) was also measured in the same electrochemical system, and the electrode potential was reported as values referred to the apparent standard potential of the system. The referenced value was converted to SCE by adding 0.48 V (in  $\text{CH}_2\text{Cl}_2$ ) or 0.38 V (in MeCN).<sup>11</sup> A scan rate was used 0.1 V/s.

Samples for photophysical measurements were prepared using high purity chloroform. Solutions of the catalysts were diluted to a concentration of 10  $\mu\text{M}$  and a total volume of 10.0 mL before being transferred to a 3.5 mL quartz cell.

Excited-state oxidation potentials ( $E_{1/2}(\text{C}^+/\text{C}^*)$ ) were calculated by subtracting the ground-state oxidation potential ( $E_{1/2}(\text{C}^+/\text{C})$ ), obtained by cyclic voltammetry, from the excitation energy ( $E_{0,0}$ );  $E_{0,0}$  is determined by calculating the energy of the wavelength at which the substrate's UV-Vis absorption and emission spectra overlap.

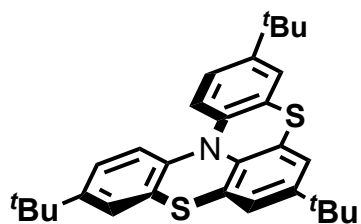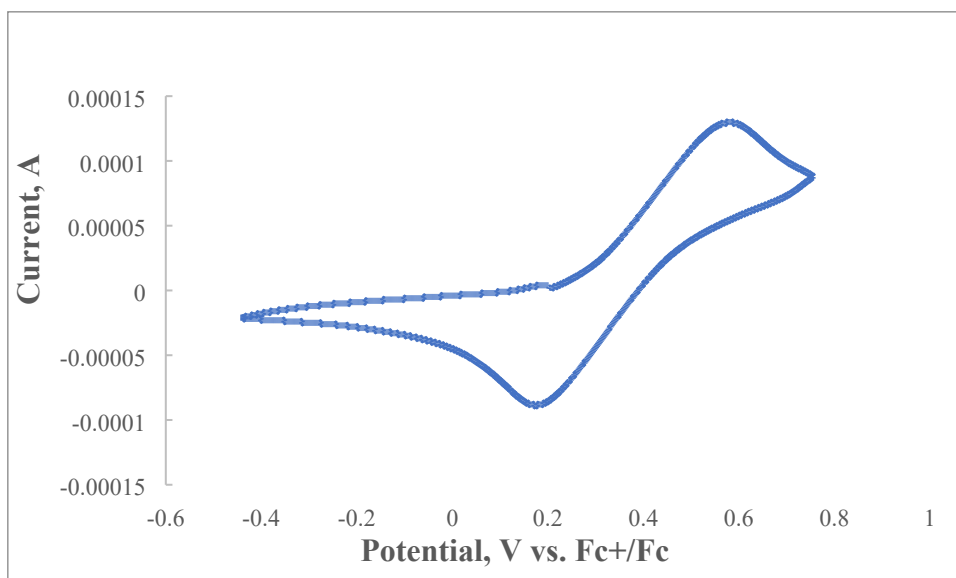

$E_{1/2}(C^+/C) = +0.38 \text{ V vs. Fc/Fc}^+ (+0.86 \text{ V vs. SCE})$  in  $\text{CH}_2\text{Cl}_2$

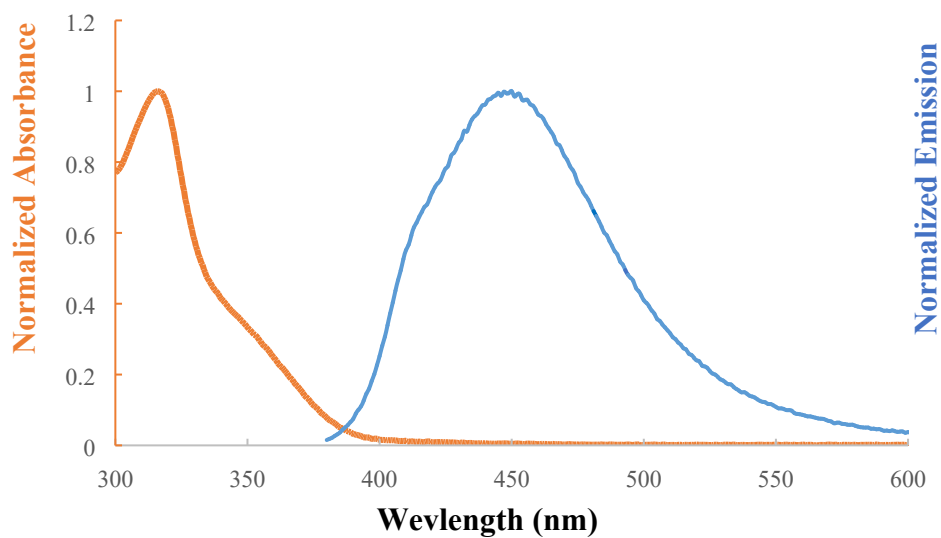

$$E_{0,0} = \frac{1240 \text{ nm} \cdot \text{eV}}{387 \text{ nm}} = 3.20 \text{ eV}$$

$$E_{1/2}(C^+/C^*) = E_{1/2}(C^+/C) - E_{0,0}$$

$$= +0.86 \text{ V} - 3.20 \text{ V}$$

$$= -2.34 \text{ V vs. SCE in } \text{CH}_2\text{Cl}_2$$

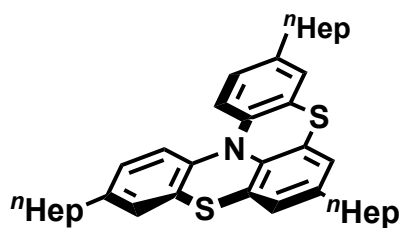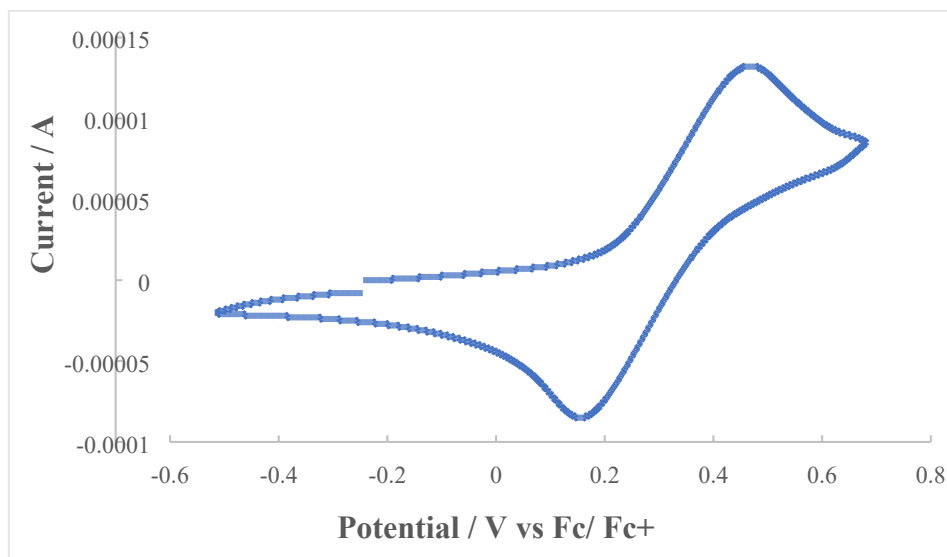

$E_{1/2}(\text{C}^{+}/\text{C}) = +0.32 \text{ V vs. Fc/Fc}^{+} (+0.80 \text{ V vs. SCE})$  in  $\text{CH}_2\text{Cl}_2$

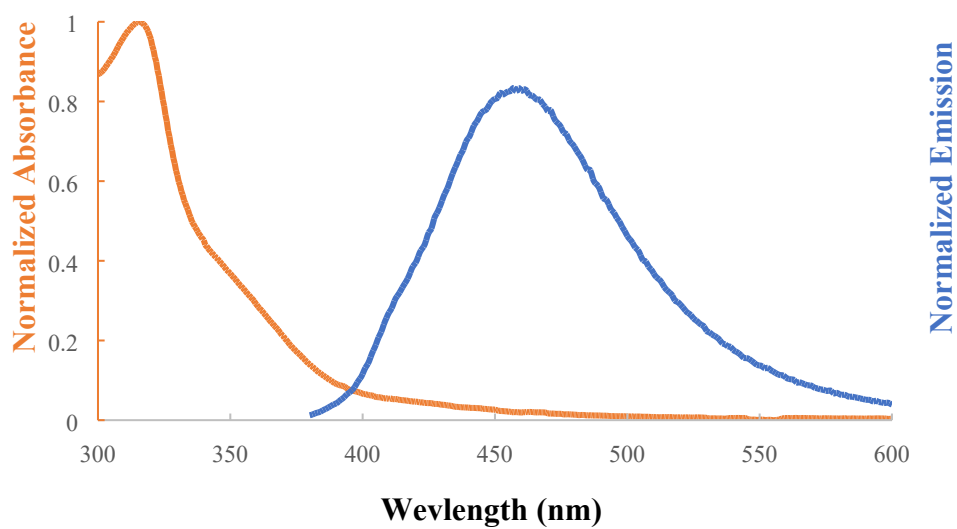

$$E_{0,0} = \frac{1240 \text{ nm} \cdot \text{eV}}{394 \text{ nm}} = 3.15 \text{ eV}$$

$$E_{1/2}(\text{C}^{+}/\text{C}^{*}) = E_{1/2}(\text{C}^{+}/\text{C}) - E_{0,0}$$

$$= +0.80 \text{ V} - 3.15 \text{ V}$$

$$= -2.35 \text{ V vs. SCE in } \text{CH}_2\text{Cl}_2$$

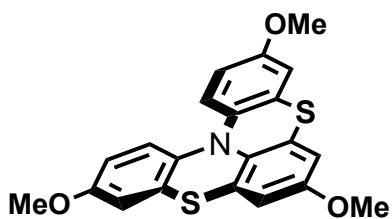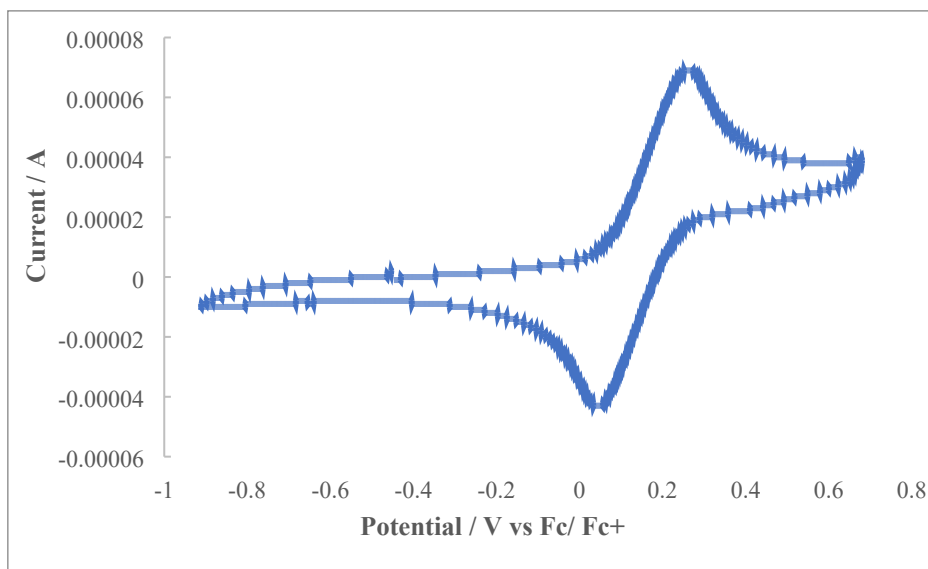

$E_{1/2}(C^+/C) = +0.16 \text{ V vs. Fc/Fc}^+ (+0.64 \text{ V vs. SCE})$  in  $\text{CH}_2\text{Cl}_2$

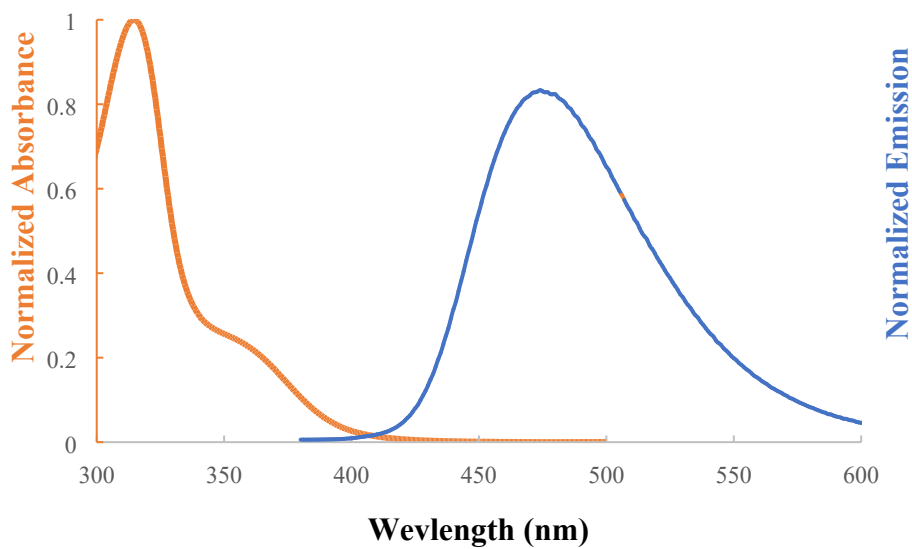

$$E_{0,0} = \frac{1240 \text{ nm} \cdot \text{eV}}{407 \text{ nm}} = 3.04 \text{ eV}$$

$$E_{1/2}(C^+/C^*) = E_{1/2}(C^+/C) - E_{0,0}$$

$$= +0.64 \text{ V} - 3.04 \text{ V}$$

$$= -2.40 \text{ V vs. SCE in } \text{CH}_2\text{Cl}_2$$

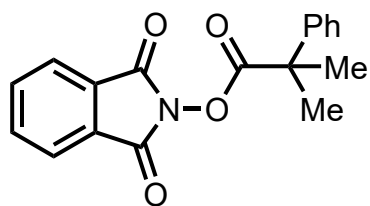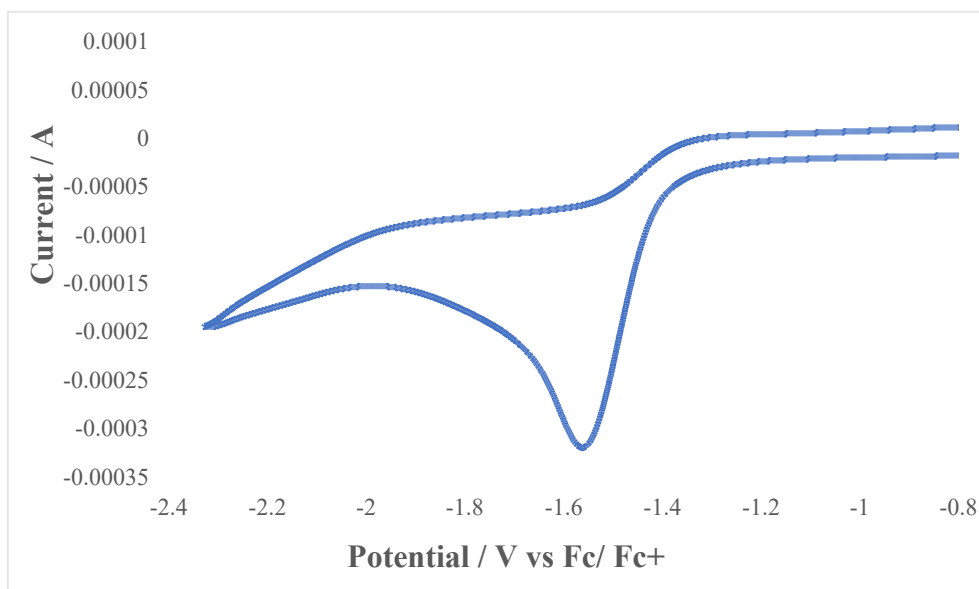

$E_{p/2} = -1.46$  V vs Fc/Fc<sup>+</sup> (-1.08 V vs. SCE) in MeCN

#### 4. Reference

1. S. Chen, Z. Li, K. Hu, W. Feng, G. Mao, F. Xiao and G. Deng, *Org. Biomol. Chem.*, 2023, **21**, 1920-1926.
2. G. Lamanna, C. Faggi, F. Gasparrini, A. Ciogli, C. Villani, P. J. Stephens, F. J. Devlin and S. Menichetti, *Chem. Eur. J.*, 2008, **14**, 5747-5750.
3. Y. Liu, Y. Xu, Y. Zhang, W. Gao and X. Shao, *Org. Chem. Front.* 2022, **9**, 6490-6497.
4. Y. Yasu, T. Koike and M. Akita, *Angew. Chem. Int. Ed.*, 2012, **51**, 9567-9571.
5. S. Shibutani, T. Kodo, M. Takeda, K. Nagao, N. Tokunaga, Y. Sasaki and H. Ohmiya, *J. Am. Chem. Soc.*, 2020, **142**, 1211-1216.
6. C. Zheng, Y. Wang, Y. Xu, Z. Chen, G. Chen and S. H. Liang, *Org. Lett.*, 2018, **20**, 4824-4827.
7. V. Soulard, G. Villa, D. P. Vollmar and P. Renaud, *J. Am. Chem. Soc.*, 2018, **140**, 155-158.
8. H. Wang and N. T. Jui, *J. Am. Chem. Soc.*, 2018, **140**, 163-166.
9. L. Pan, A. S. Kelley, M. V. Cooke, M. M. Deckert and S. Laulhe, *ACS Sustainable Chem. Eng.*, 2022, **10**, 691-695.
10. J. Liu, H. Liu, X. Guo, Z. Wang, X. Wu, J. Li and C. Zhu, *Green Chem.*, 2023, **25**, 3847-3851.
11. G. C. Neil and E. G. William. *Chem. Rev.*, 1996, **96**, 877-910.

## 5. $^1\text{H}$ and $^{13}\text{C}$ NMR spectra data

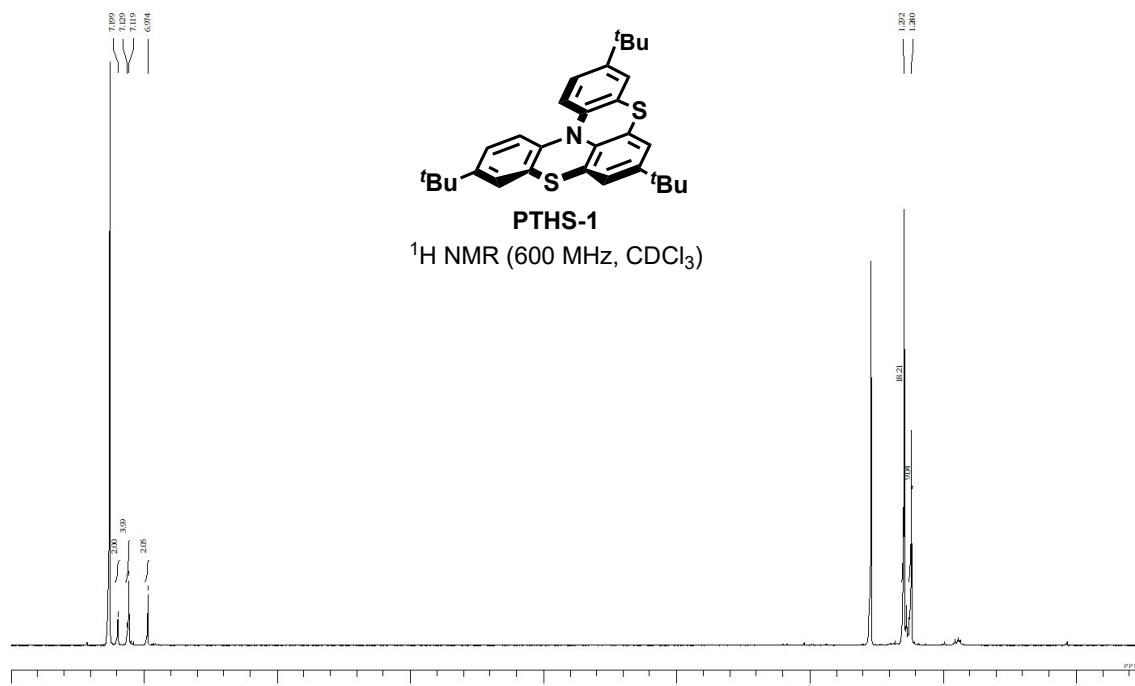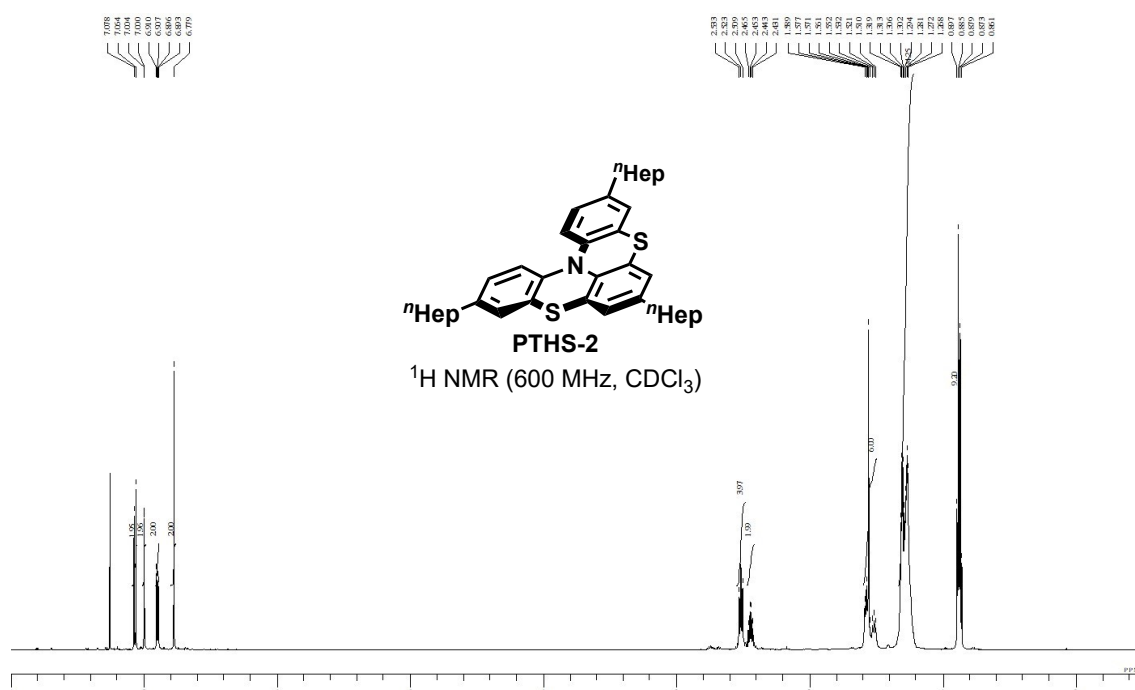



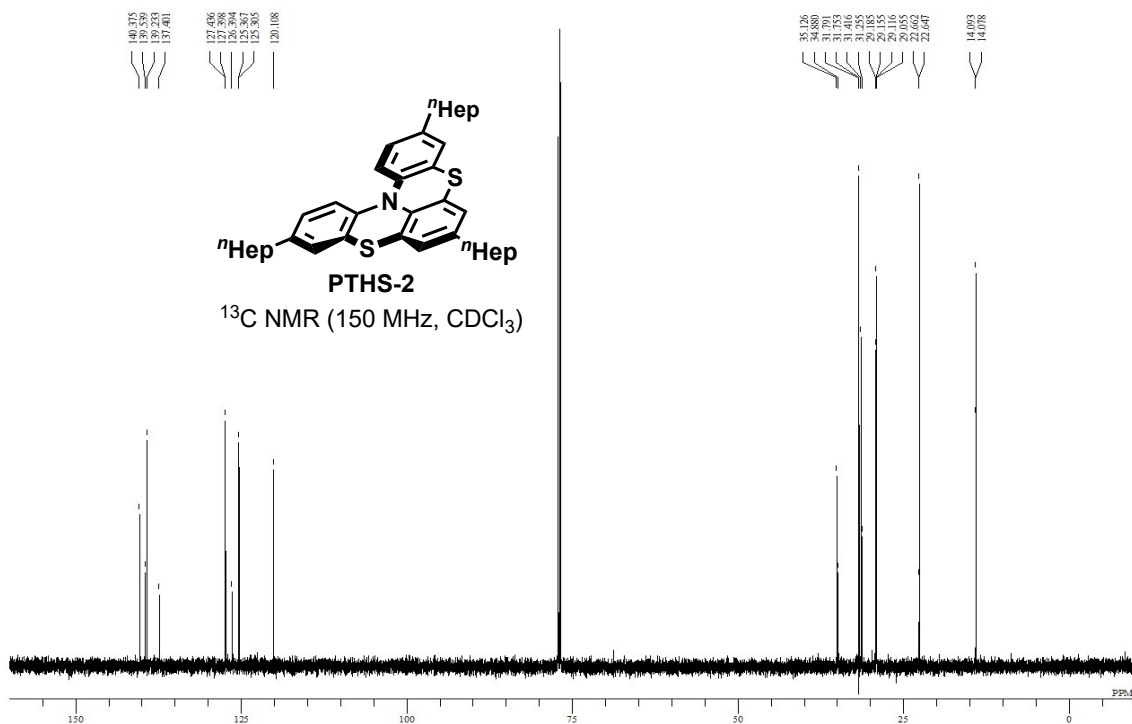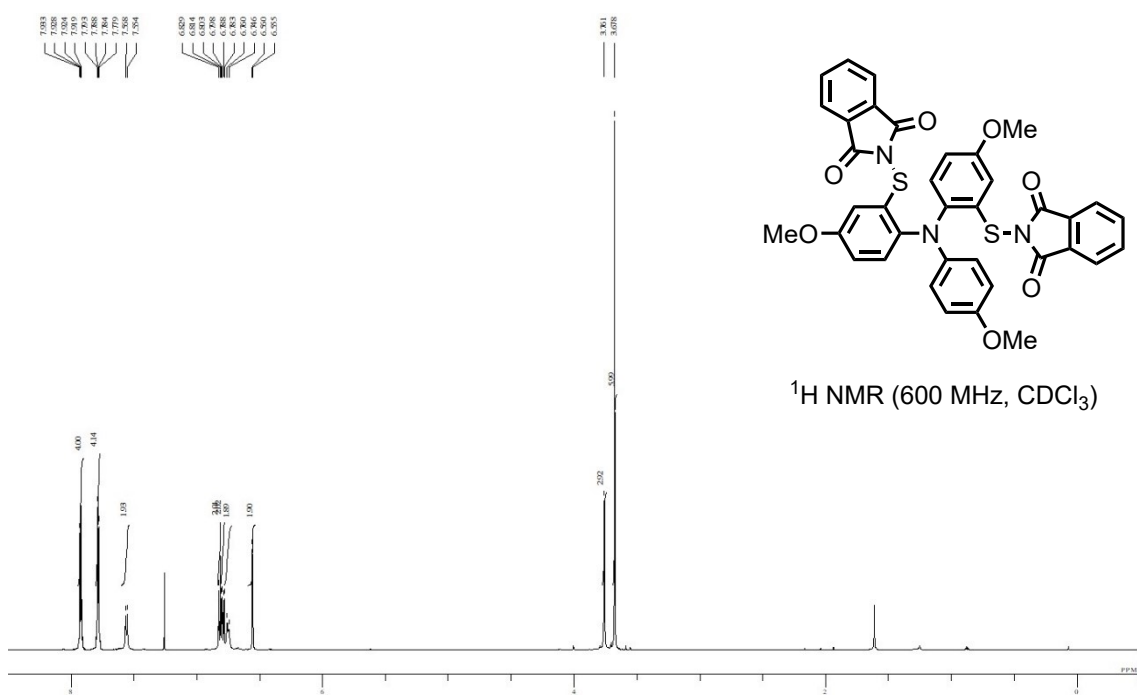

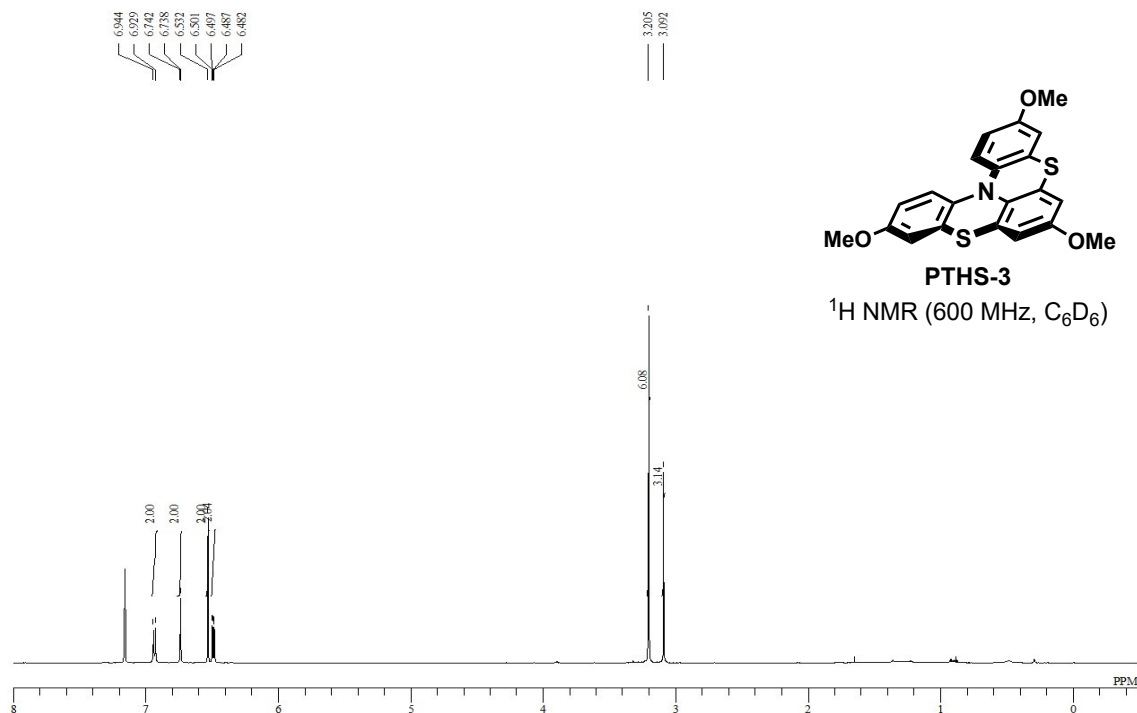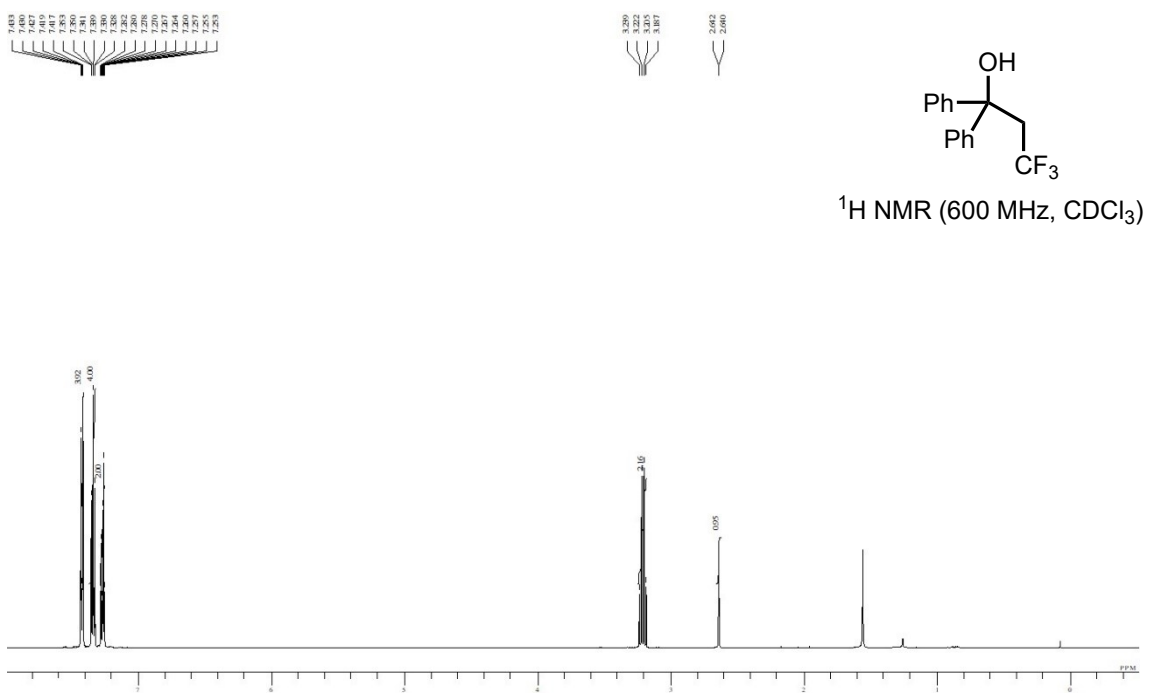

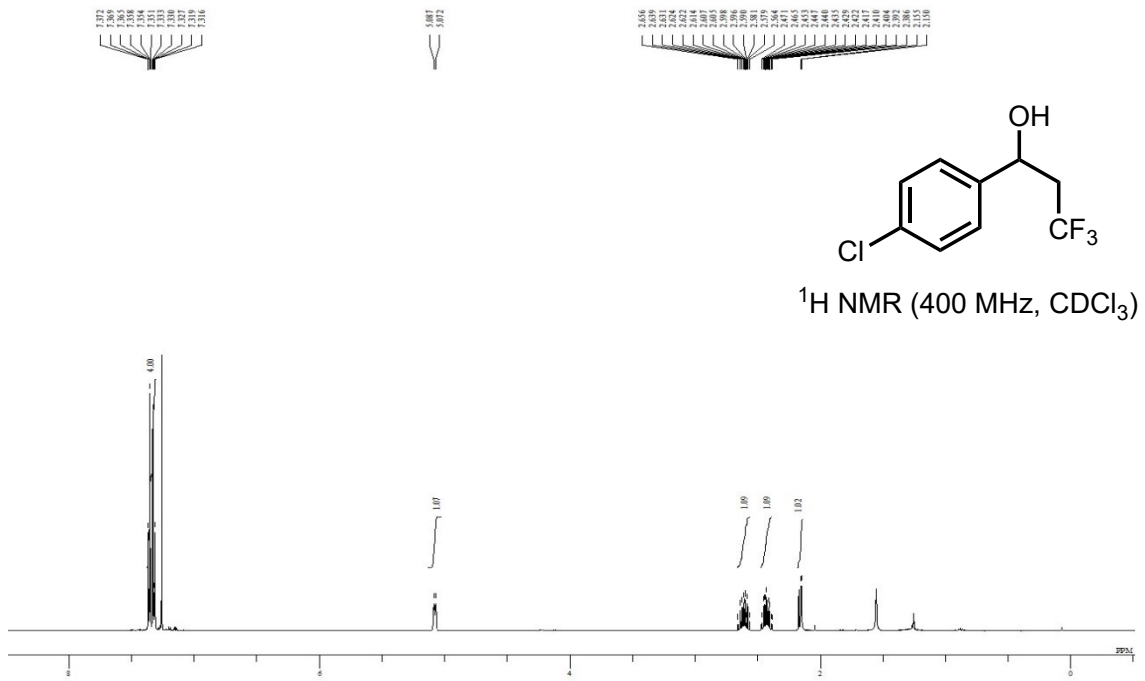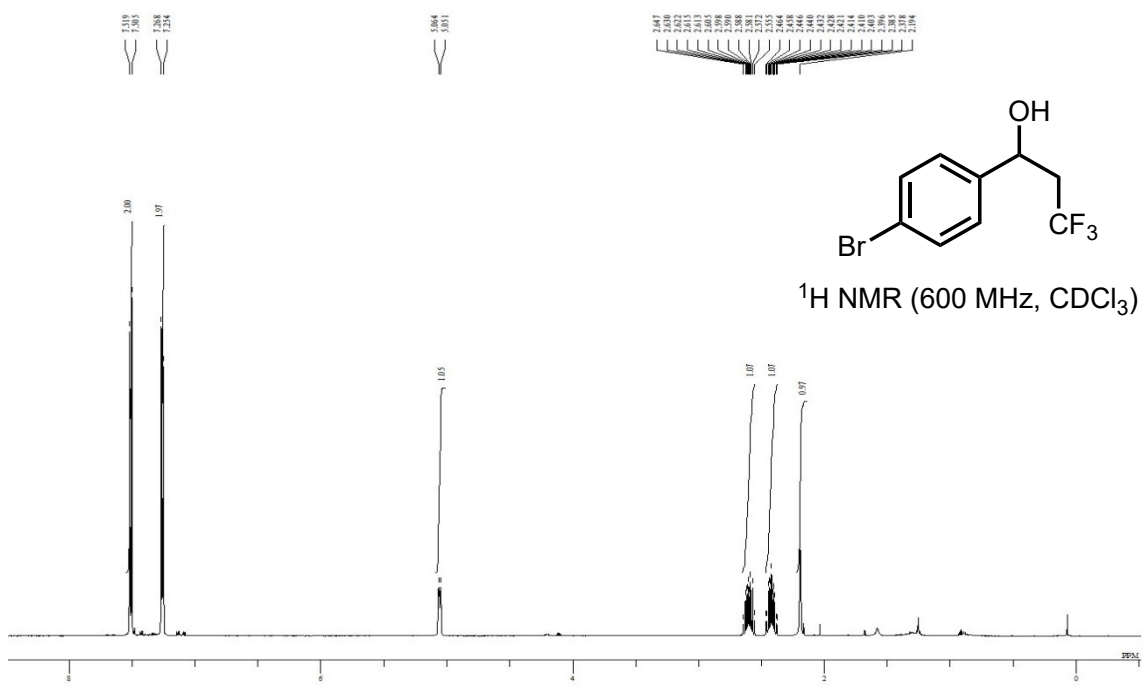

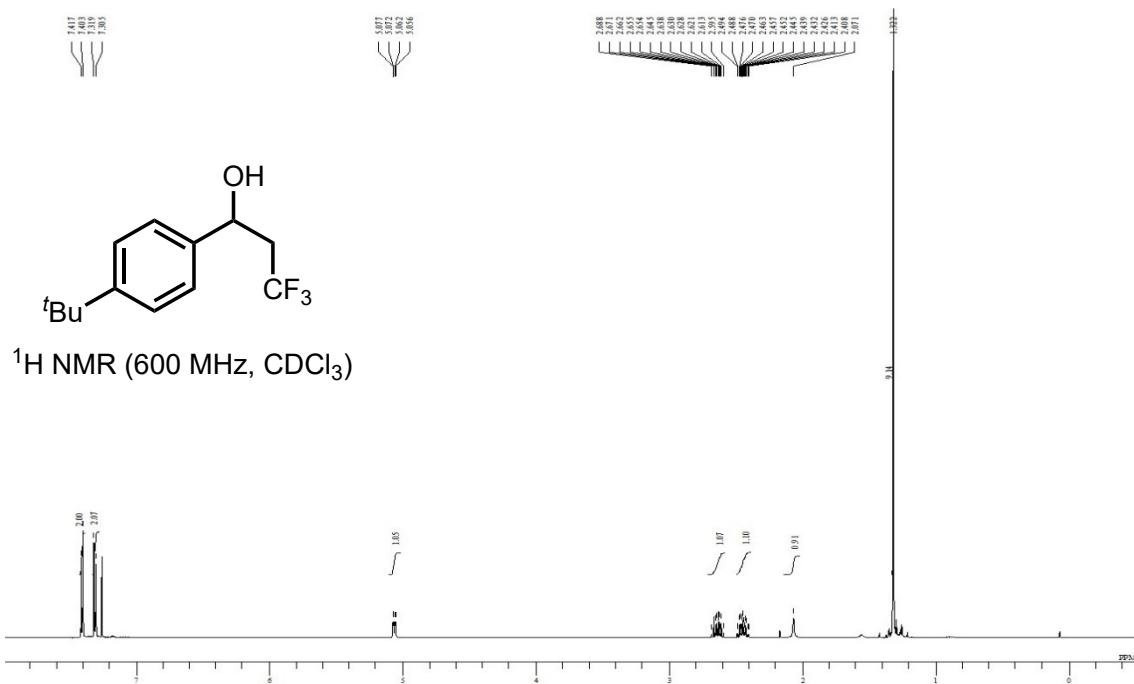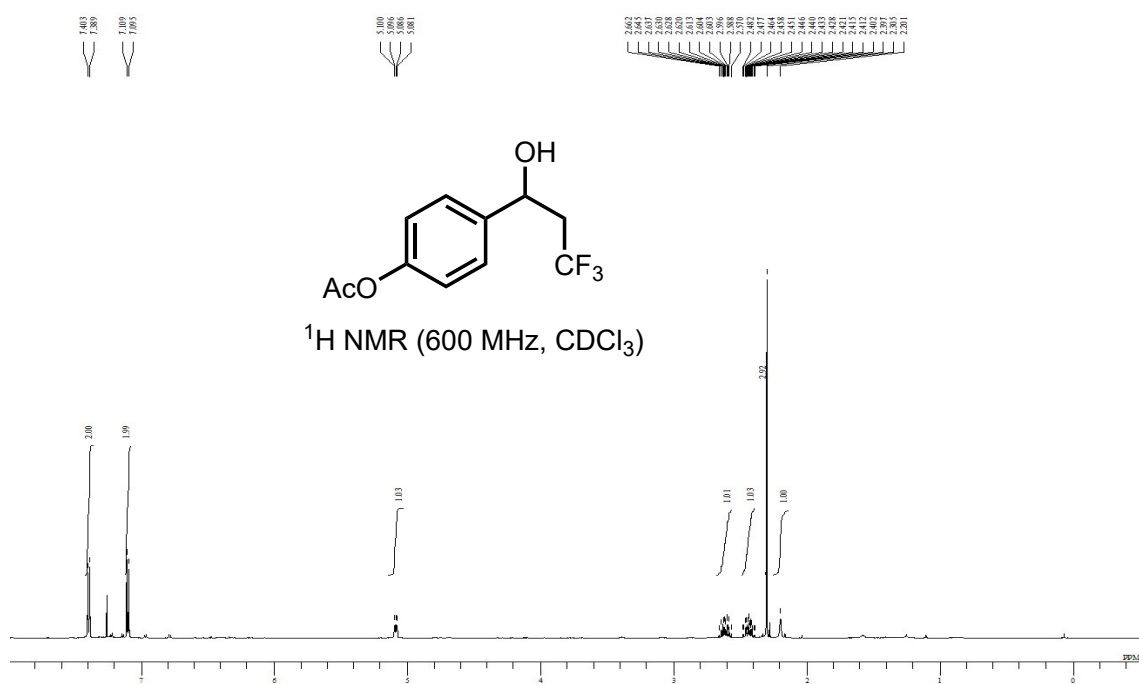

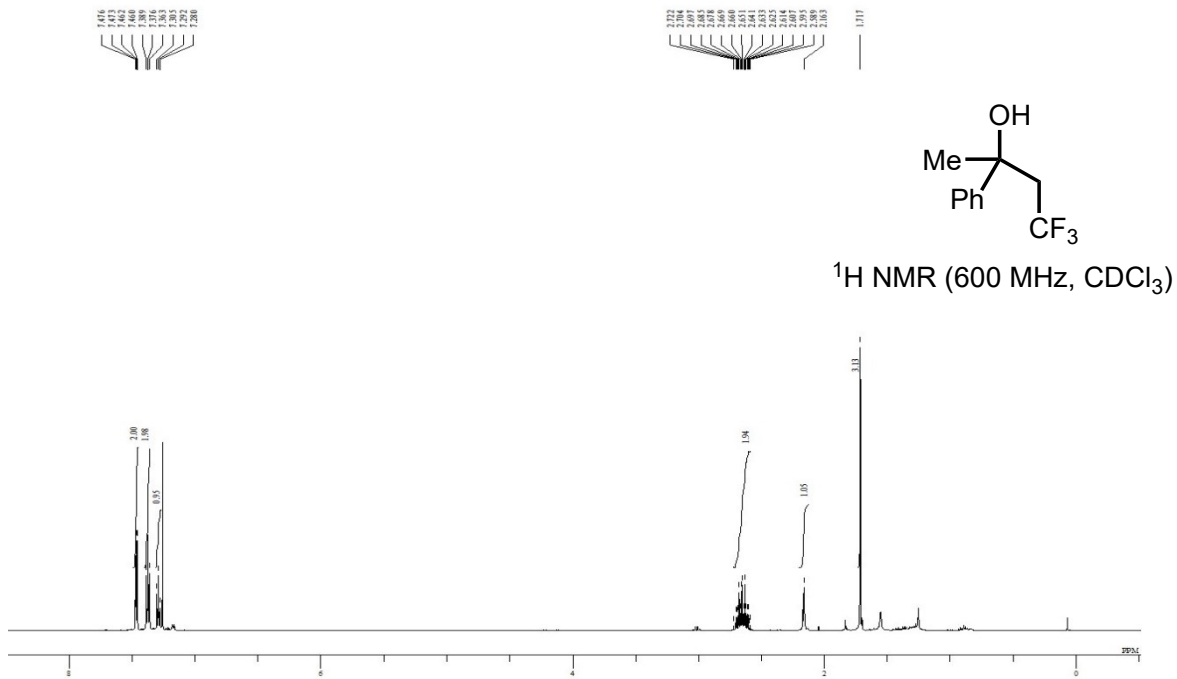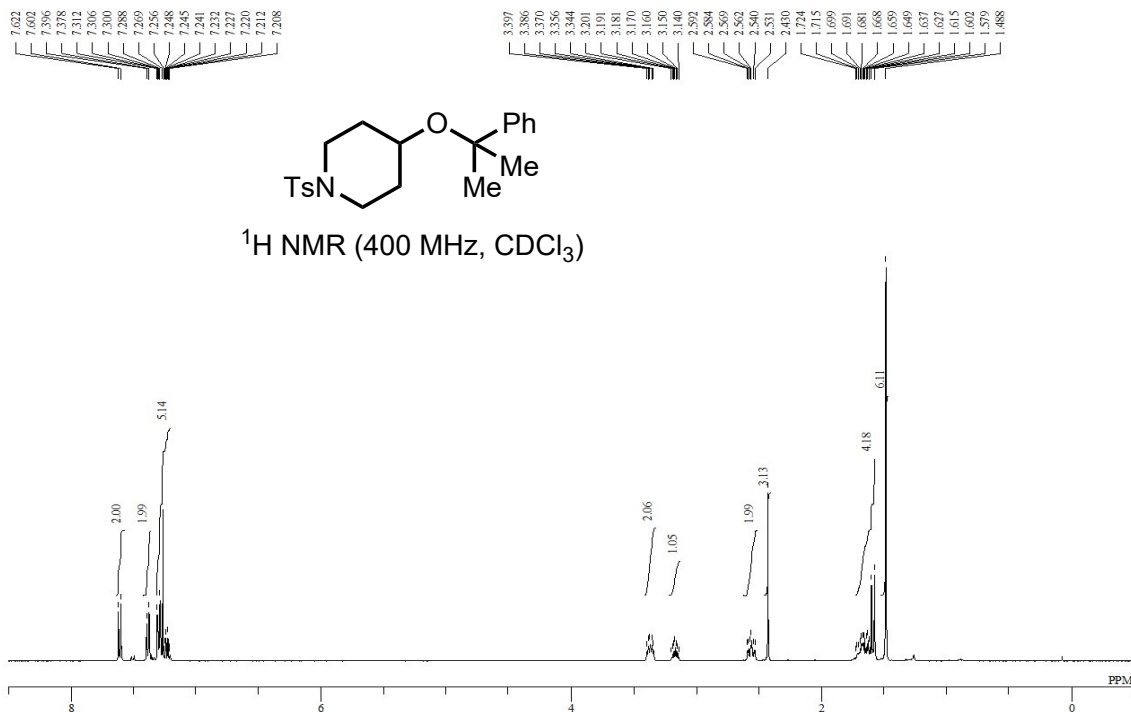

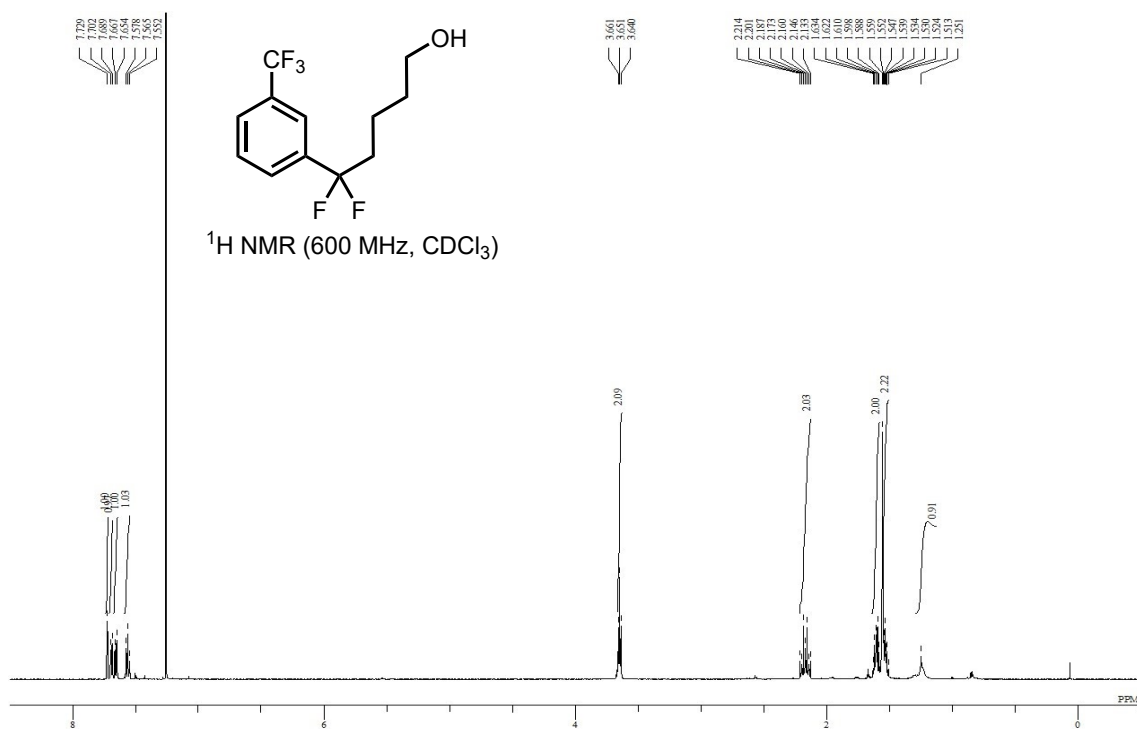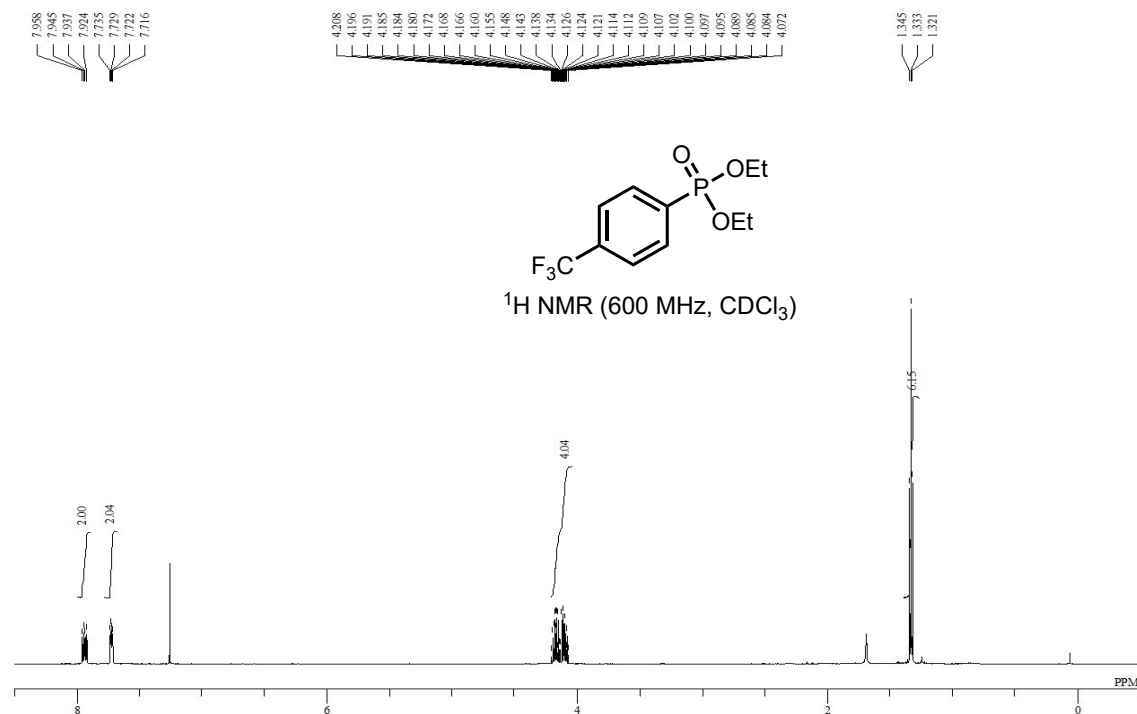

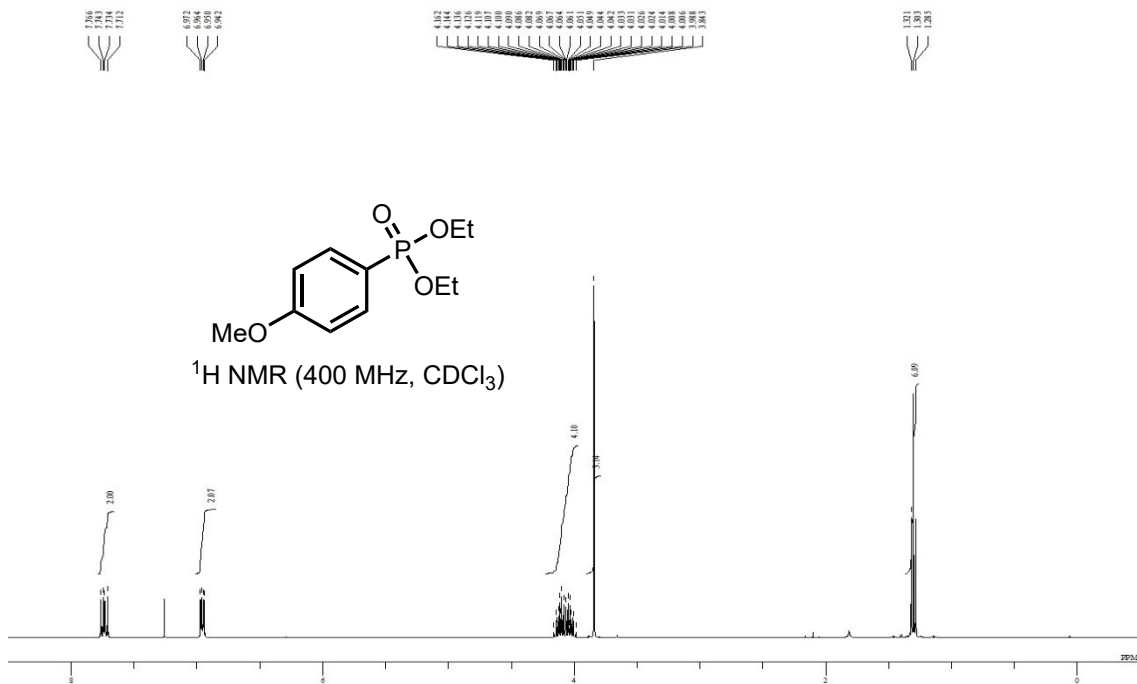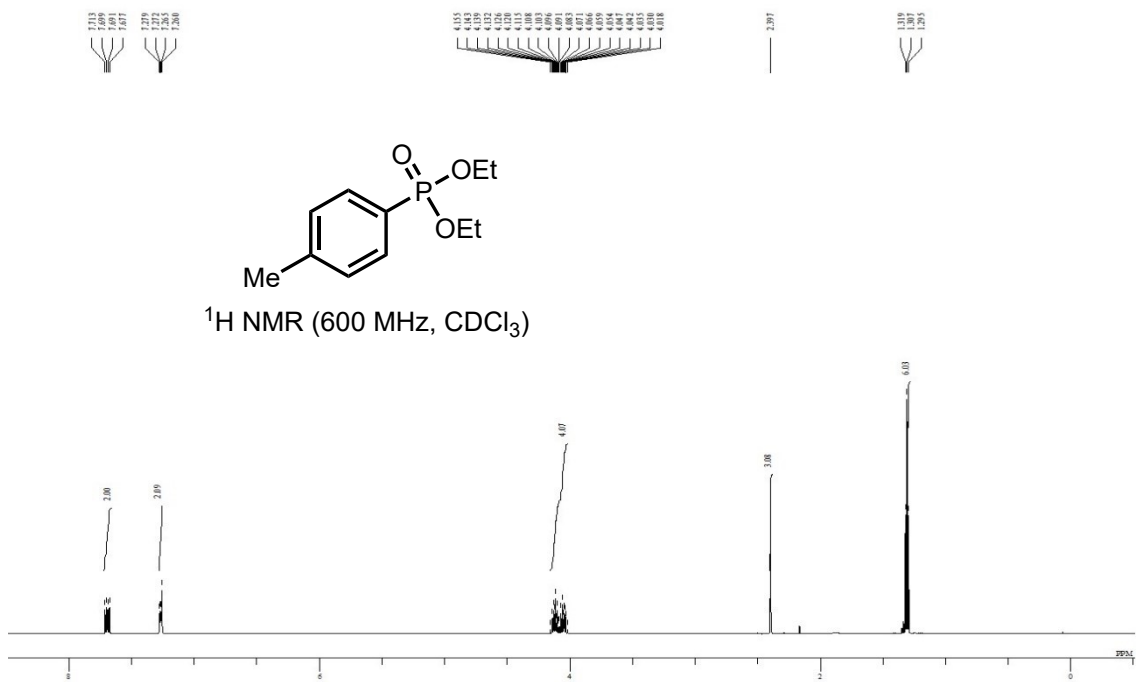

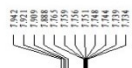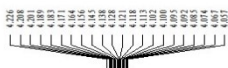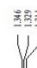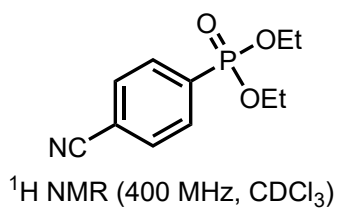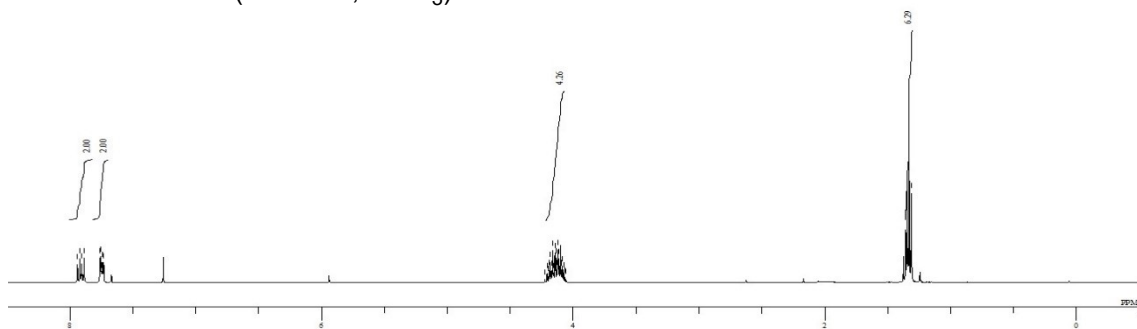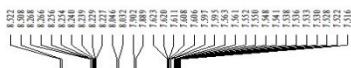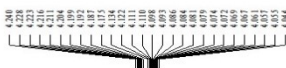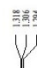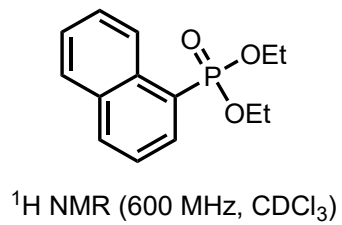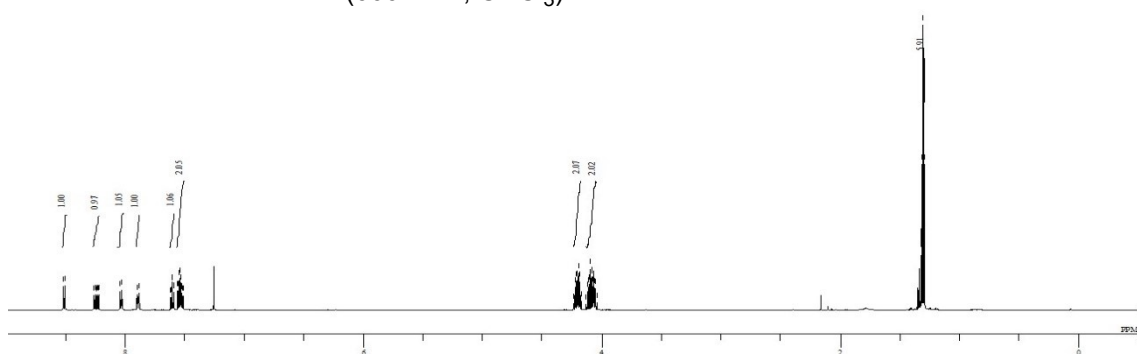



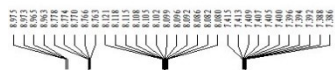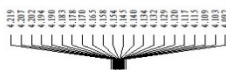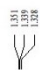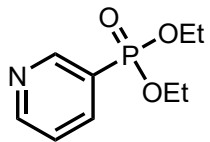

$^1\text{H NMR}$  (600 MHz,  $\text{CDCl}_3$ )

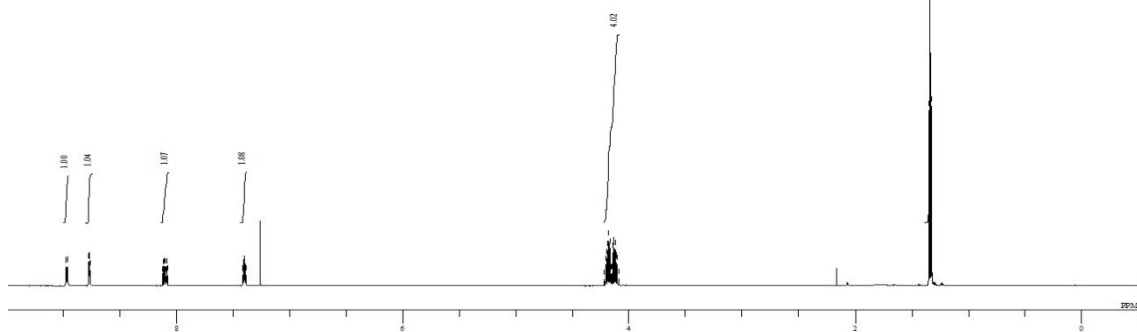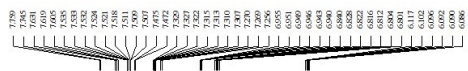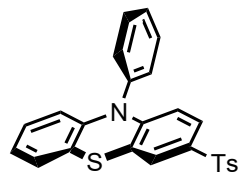

$^1\text{H NMR}$  (600 MHz,  $\text{CDCl}_3$ )

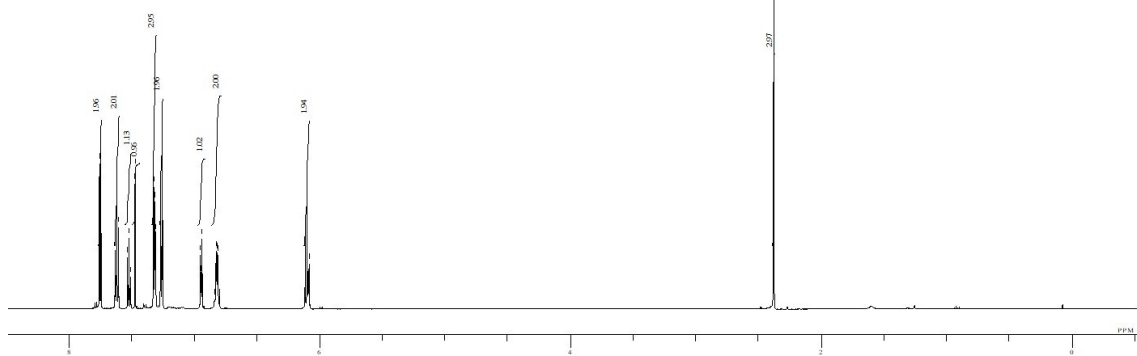

Supplement: d4cc00904e1.pdf [file d4cc00904e1.pdf]
